# Supplementary material
Source: publisher figshare collection journal article supplement (https://geolsoc.figshare.com/ndownloader/files/22643042)
Supplement: Supplementary file 1 [file 22643042]

## Sheet: PlotDat16
Source sheet	data	169.001	0.0534612	145	0.0469033	178.568	0.0467407	156.797	0.075	175.494	0.0534612	173.761	0.0491914	172.631	0.0473992	173.256	0.0467646	171.14	0.051152	169.67	0.0473236	170.421	0.0593012	170.992	0.0515765	168.748	0.0488404	168.429	0.0519013	169.727	0.0474864	167.624	0.0546555	166.662	0.0514053	166.817	0.047914	166.306	0.0469014	166.086	0.0489029	165.726	0.049545	169.754	0.0608742	165.545	0.0486728	164.813	0.0473488
Plot name	Concordia13	166.701	0.0491914	145.001	0.0469033	173.728	0.0467602	164.023	0.04	175.431	0.0539756	173.665	0.049572	172.54	0.0477645	173.181	0.0474811	171.08	0.0517454	169.588	0.0476957	170.352	0.0602144	170.886	0.0520159	168.662	0.049205	168.368	0.0524559	169.622	0.0480198	167.537	0.054973	166.604	0.0523142	166.732	0.0482677	166.225	0.0472066	166.006	0.0493896	165.644	0.0500201	169.651	0.0618255	165.456	0.0491095	164.732	0.0477717
Plot Type	1	165.967	0.0473992	145.981	0.0468975	169.143	0.0467798			175.242	0.05448	173.379	0.0499422	172.27	0.0481197	172.957	0.0481836	170.9	0.0523272	169.344	0.0480577	170.148	0.0611098	170.57	0.0524433	168.409	0.0495595	168.187	0.0529998	169.309	0.0485386	167.28	0.0552818	166.433	0.0532054	166.48	0.0486117	165.985	0.0475035	165.767	0.0498631	165.399	0.0504823	169.345	0.0627582	165.191	0.0495342	164.491	0.0481831
1st free col	55	165.515	0.0467646	146.973	0.0468916	164.793	0.0467993			174.933	0.0549646	172.91	0.0502918	171.828	0.0484553	172.587	0.0488585	170.604	0.0528861	168.944	0.0483996	169.811	0.06197	170.053	0.0528471	167.993	0.0498945	167.889	0.0535223	168.797	0.0490288	166.859	0.0555736	166.151	0.0540616	166.068	0.0489367	165.593	0.0477839	165.376	0.0503104	164.999	0.050919	168.841	0.0636543	164.758	0.0499355	164.096	0.0485718
Sigma Level	1	164.939	0.051152	147.98	0.0468858	160.661	0.0468189			174.507	0.0554198	172.272	0.0506115	171.226	0.0487621	172.08	0.0494926	170.198	0.0534113	168.4	0.0487122	169.349	0.0627783	169.349	0.0532162	167.428	0.0502007	167.481	0.0540132	168.099	0.0494768	166.285	0.0558403	165.763	0.054866	165.507	0.0492337	165.06	0.0480403	164.844	0.0507194	164.454	0.0513181	168.149	0.0644962	164.168	0.0503023	163.558	0.0489271
Absolute Errs	FALSE	163.649	0.0473236	149	0.04688	156.73	0.0468385			173.975	0.055837	171.483	0.0508925	170.481	0.0490317	171.445	0.0500736	169.689	0.0538925	167.727	0.0489869	168.77	0.0635189	168.477	0.0535406	166.727	0.0504699	166.969	0.054463	167.236	0.0498706	165.575	0.0560747	165.278	0.0556031	164.812	0.0494948	164.399	0.0482656	164.185	0.0510787	163.78	0.0516689	167.283	0.0652676	163.437	0.0506247	162.893	0.0492393
Symbol Type	1	163.366	0.0593012	150.034	0.0468742	152.987	0.0468581			173.346	0.0562079	170.562	0.051127	169.612	0.0492568	170.695	0.0505902	169.088	0.0543204	166.942	0.0492162	168.087	0.0641774	167.461	0.0538114	165.911	0.0506945	166.364	0.054863	166.229	0.0501994	164.748	0.0562704	164.705	0.0562585	164.002	0.0497128	163.629	0.0484537	163.417	0.0513787	162.994	0.0519617	166.259	0.0659536	162.586	0.0508938	162.117	0.0495
Inverse Plot	TRUE	163.199	0.0515765	151.082	0.0468684	149.417	0.0468777			172.632	0.0565254	169.537	0.0513087	168.644	0.0494312	169.844	0.0510324	168.406	0.0546866	166.068	0.0493939	167.311	0.0647409	166.329	0.0540212	165.002	0.0508686	165.678	0.0552053	165.108	0.0504541	163.826	0.056422	164.055	0.0568194	163.099	0.0498817	162.771	0.0485995	162.561	0.0516112	162.118	0.0521887	165.098	0.0665407	161.637	0.0511024	161.253	0.049702
Color Plot	TRUE	162.487	0.0488404	152.146	0.0468626	146.01	0.0468973			171.848	0.0567832	168.434	0.0514327	167.603	0.0495502	168.909	0.0513915	167.657	0.054984	165.127	0.0495152	166.459	0.0651986	165.112	0.0541644	164.024	0.0509874	164.924	0.0554833	163.902	0.0506279	162.835	0.0565254	163.341	0.057275	162.129	0.0499969	161.848	0.0486989	161.641	0.0517698	161.176	0.0523435	163.822	0.0670174	160.617	0.0512446	160.324	0.0498398
3D plot	FALSE	162.189	0.0519013	153.224	0.0468568	IsoLine	IsoLine			171.008	0.0569764	167.284	0.0514956	166.518	0.0496105	167.907	0.0516605	166.855	0.0552068	164.146	0.0495766	165.546	0.0655416	163.842	0.0542369	163.004	0.0510476	164.117	0.0556916	162.644	0.050716	161.801	0.0565779	162.576	0.0576163	161.116	0.0500553	160.885	0.0487493	160.681	0.0518502	160.194	0.0524219	162.456	0.0673746	159.553	0.0513168	159.354	0.0499097
Linear	FALSE	162.007	0.0474864	154.318	0.046851					170.129	0.0571011	166.118	0.0514956	165.417	0.0496105	166.859	0.0518343	166.016	0.0553507	163.152	0.0495766	164.591	0.065763	162.555	0.0542369	161.97	0.0510476	163.273	0.0558261	161.369	0.050716	160.753	0.0565779	161.776	0.0578367	160.09	0.0500553	159.909	0.0487493	159.708	0.0518502	159.198	0.0524219	161.026	0.0676053	158.474	0.0513168	158.372	0.0499097
Data Range	T90:W111	161.277	0.0546555	155.427	0.0468452					169.228	0.057155	164.967	0.0514327	164.331	0.0495502	165.785	0.0519093	165.155	0.0554129	162.171	0.0495152	163.612	0.0658587	161.286	0.0541644	160.95	0.0509874	162.407	0.0558842	160.111	0.0506279	159.719	0.0565254	160.955	0.0579319	159.078	0.0499969	158.947	0.0486989	158.748	0.0517698	158.215	0.0523435	159.56	0.067705	157.41	0.0512446	157.402	0.0498398
		160.749	0.0514053	156.552	0.0468394					168.323	0.057137	163.865	0.0513087	163.29	0.0494312	164.706	0.0518843	164.291	0.0553921	161.23	0.0493939	162.628	0.0658268	160.068	0.0540212	159.972	0.0508686	161.537	0.0558648	158.905	0.0504541	158.728	0.056422	160.131	0.0579001	158.107	0.0498817	158.024	0.0485995	157.828	0.0516112	157.273	0.0521887	158.087	0.0676717	156.39	0.0511024	156.473	0.049702
		160.603	0.047914	157.694	0.0468336					167.431	0.0570475	162.839	0.051127	162.322	0.0492568	163.642	0.0517596	163.439	0.0552888	160.356	0.0492162	161.659	0.0656678	158.936	0.0538114	159.063	0.0506945	160.68	0.0557682	157.784	0.0501994	157.806	0.0562704	159.319	0.0577419	157.205	0.0497128	157.166	0.0484537	156.972	0.0513787	156.397	0.0519617	156.636	0.0675061	155.441	0.0508938	155.609	0.0495
		160.397	0.0469014	158.853	0.0468278					166.569	0.0568882	161.919	0.0508925	161.454	0.0490317	162.615	0.0515376	162.616	0.055105	159.571	0.0489869	160.723	0.0653849	157.92	0.0535406	158.247	0.0504699	159.852	0.0555964	156.778	0.0498706	156.979	0.0560747	158.534	0.0574604	156.395	0.0494948	156.396	0.0482656	156.204	0.0510787	155.611	0.0516689	155.235	0.0672115	154.59	0.0506247	154.833	0.0492393
		160.194	0.0489029	160.028	0.046822					165.755	0.0566621	161.129	0.0506115	160.708	0.0487621	161.644	0.0512228	161.838	0.0548443	158.898	0.0487122	159.838	0.0649836	157.049	0.0532162	157.547	0.0502007	159.07	0.0553527	155.914	0.0494768	156.269	0.0558403	157.793	0.057061	155.7	0.0492337	155.735	0.0480403	155.545	0.0507194	154.937	0.0513181	153.91	0.0667935	153.859	0.0503023	154.168	0.0489271
		159.696	0.049545	161.221	0.0468162					165.004	0.0563738	160.491	0.0502918	160.106	0.0484553	160.749	0.0508212	161.121	0.0545117	158.354	0.0483996	159.022	0.0644717	156.345	0.0528471	156.981	0.0498945	158.348	0.0550418	155.217	0.0490288	155.695	0.0555736	157.109	0.0565515	155.138	0.0489367	155.201	0.0477839	155.013	0.0503104	154.392	0.050919	152.689	0.0662602	153.269	0.0499355	153.63	0.0485718
		159.192	0.0608742	162.432	0.0468104					164.331	0.0560287	160.023	0.0499422	159.664	0.0481197	159.946	0.0503406	160.478	0.0541137	157.954	0.0480577	158.291	0.0638592	155.828	0.0524433	156.566	0.0495595	157.701	0.0546697	154.704	0.0485386	155.274	0.0552818	156.496	0.0559418	154.726	0.0486117	154.809	0.0475035	154.622	0.0498631	153.992	0.0504823	151.593	0.0656222	152.836	0.0495342	153.236	0.0481831
		159.013	0.0486728	163.661	0.0468046					163.749	0.0556337	159.737	0.049572	159.394	0.0477645	159.252	0.0497905	159.922	0.053658	157.71	0.0476957	157.658	0.063158	155.512	0.0520159	156.312	0.049205	157.142	0.0542438	154.391	0.0480198	155.017	0.054973	155.966	0.0552439	154.474	0.0482677	154.57	0.0472066	154.383	0.0493896	153.747	0.0500201	150.646	0.0648917	152.571	0.0491095	152.994	0.0477717
		158.863	0.0473488	164.909	0.0467988					163.269	0.0551964	159.64	0.0491914	159.303	0.0473992	158.679	0.0491814	159.463	0.0531536	157.628	0.0473236	157.136	0.0623816	155.405	0.0515765	156.227	0.0488404	156.68	0.0537723	154.286	0.0474864	154.93	0.0546555	155.528	0.0544712	154.389	0.047914	154.489	0.0469014	154.303	0.0489029	153.665	0.049545	149.865	0.064083	152.482	0.0486728	152.913	0.0473488
		158.22	0.0477583	166.176	0.046793					162.901	0.0547254	159.737	0.0488109	159.394	0.047034	158.24	0.0485253	159.112	0.0526102	157.71	0.0469515	156.736	0.0615454	155.512	0.0511371	156.312	0.0484759	156.326	0.0532643	154.391	0.046953	155.017	0.054338	155.193	0.0536389	154.474	0.0475604	154.57	0.0465962	154.383	0.0484161	153.747	0.0490698	149.266	0.0632119	152.571	0.0482361	152.994	0.0469258
		157.527	0.0579411	167.462	0.0467872					162.651	0.0542297	160.023	0.0484407	159.664	0.0466788	157.942	0.0478349	158.873	0.0520384	157.954	0.0465896	156.465	0.0606654	155.828	0.0507097	156.566	0.0481213	156.086	0.0527299	154.704	0.0464341	155.274	0.0540292	154.966	0.0527631	154.726	0.0472163	154.809	0.0462993	154.622	0.0479426	153.992	0.0486076	148.86	0.0622953	152.836	0.0478114	153.236	0.0465144
		IsoLine	IsoLine	168.769	0.0467814					162.525	0.0537191	160.491	0.0480911	160.106	0.0463432	157.792	0.0471237	158.753	0.0514494	158.354	0.0462477	156.328	0.0597589	156.345	0.0503059	156.981	0.0477863	155.965	0.0521793	155.217	0.045944	155.695	0.0537374	154.851	0.0518609	155.138	0.0468914	155.201	0.0460188	155.013	0.0474953	154.392	0.048171	148.655	0.061351	153.269	0.0474101	153.63	0.0461258
				170.096	0.0467756					162.525	0.0532034	161.129	0.0477714	160.708	0.0460364	157.792	0.0464056	158.753	0.0508546	158.898	0.0459351	156.328	0.0588435	157.049	0.0499368	157.547	0.0474801	155.965	0.0516233	155.914	0.0454959	156.269	0.0534707	154.851	0.0509498	155.7	0.0465943	155.735	0.0457624	155.545	0.0470864	154.937	0.0477718	148.655	0.0603975	153.859	0.0470433	154.168	0.0457705
				171.444	0.0467698					162.651	0.0526928	161.919	0.0474904	161.454	0.0457668	157.942	0.0456944	158.873	0.0502656	159.571	0.0456604	156.465	0.057937	157.92	0.0496124	158.247	0.047211	156.086	0.0510727	156.778	0.0451021	156.979	0.0532363	154.966	0.0500476	156.395	0.0463332	156.396	0.0455371	156.204	0.046727	155.611	0.0474211	148.86	0.0594532	154.59	0.0467209	154.833	0.0454582
				172.813	0.0467641					162.901	0.0521971	162.839	0.0472559	162.322	0.0455417	158.24	0.045004	159.112	0.0496938	160.356	0.045431	156.736	0.057057	158.936	0.0493416	159.063	0.0469863	156.326	0.0505382	157.784	0.0447734	157.806	0.0530407	155.193	0.0491718	157.205	0.0461152	157.166	0.045349	156.972	0.046427	156.397	0.0471282	149.266	0.0585366	155.441	0.0464518	155.609	0.0451975
				174.205	0.0467583					163.269	0.0517261	163.865	0.0470742	163.29	0.0453673	158.679	0.0443479	159.463	0.0491505	161.23	0.0452533	157.136	0.0562208	160.068	0.0491318	159.972	0.0468122	156.68	0.0500303	158.905	0.0445187	158.728	0.052889	155.528	0.0483394	158.107	0.0459463	158.024	0.0452033	157.828	0.0461945	157.273	0.0469013	149.865	0.0576654	156.39	0.0462432	156.473	0.0449956
				175.619	0.0467525					163.749	0.0512888	164.967	0.0469502	164.331	0.0452483	159.252	0.0437388	159.922	0.048646	162.171	0.0451321	157.658	0.0554445	161.286	0.0489886	160.95	0.0466934	157.142	0.0495587	160.111	0.0443449	159.719	0.0527856	155.966	0.0475668	159.078	0.0458311	158.947	0.0451038	158.748	0.046036	158.215	0.0467465	150.646	0.0568568	157.41	0.0461009	157.402	0.0448577
				177.056	0.0467467					164.331	0.0508938	166.118	0.0468873	165.417	0.045188	159.946	0.0431887	160.478	0.0481904	163.152	0.0450706	158.291	0.0547432	162.555	0.048916	161.97	0.0466332	157.701	0.0491328	161.369	0.0442568	160.753	0.0527332	156.496	0.0468688	160.09	0.0457727	159.909	0.0450534	159.708	0.0459556	159.198	0.046668	151.593	0.0561263	158.474	0.0460288	158.372	0.0447879
				178.517	0.0467409					165.004	0.0505487	167.284	0.0468873	166.518	0.045188	160.749	0.0427081	161.121	0.0477924	164.146	0.0450706	159.022	0.0541307	163.842	0.048916	163.004	0.0466332	158.348	0.0487608	162.644	0.0442568	161.801	0.0527332	157.109	0.0462592	161.116	0.0457727	160.885	0.0450534	160.681	0.0459556	160.194	0.046668	152.689	0.0554882	159.553	0.0460288	159.354	0.0447879
				180	0.0467351					165.755	0.0502604	168.434	0.0469502	167.603	0.0452483	161.644	0.0423065	161.838	0.0474598	165.127	0.0451321	159.838	0.0536188	165.112	0.0489886	164.024	0.0466934	159.07	0.0484499	163.902	0.0443449	162.835	0.0527856	157.793	0.0457497	162.129	0.0458311	161.848	0.0451038	161.641	0.046036	161.176	0.0467465	153.91	0.054955	160.617	0.0461009	160.324	0.0448577
				IsoLine	IsoLine					166.569	0.0500343	169.537	0.0470742	168.644	0.0453673	162.615	0.0419917	162.616	0.047199	166.068	0.0452533	160.723	0.0532175	166.329	0.0491318	165.002	0.0468122	159.852	0.0482061	165.108	0.0445187	163.826	0.052889	158.534	0.0453503	163.099	0.0459463	162.771	0.0452033	162.561	0.0461945	162.118	0.0469013	155.235	0.054537	161.637	0.0462432	161.253	0.0449956
										167.431	0.049875	170.562	0.0472559	169.612	0.0455417	163.642	0.0417697	163.439	0.0470152	166.942	0.045431	161.659	0.0529346	167.461	0.0493416	165.911	0.0469863	160.68	0.0480343	166.229	0.0447734	164.748	0.0530407	159.319	0.0450688	164.002	0.0461152	163.629	0.045349	163.417	0.046427	162.994	0.0471282	156.636	0.0542423	162.586	0.0464518	162.117	0.0451975
										168.323	0.0497855	171.483	0.0474904	170.481	0.0457668	164.706	0.041645	164.291	0.046912	167.727	0.0456604	162.628	0.0527757	168.477	0.0496124	166.727	0.047211	161.537	0.0479378	167.236	0.0451021	165.575	0.0532363	160.131	0.0449106	164.812	0.0463332	164.399	0.0455371	164.185	0.046727	163.78	0.0474211	158.087	0.0540767	163.437	0.0467209	162.893	0.0454582
										169.228	0.0497675	172.272	0.0477714	171.226	0.0460364	165.785	0.04162	165.155	0.0468912	168.4	0.0459351	163.612	0.0527437	169.349	0.0499368	167.428	0.0474801	162.407	0.0479184	168.099	0.0454959	166.285	0.0534707	160.955	0.0448788	165.507	0.0465943	165.06	0.0457624	164.844	0.0470864	164.454	0.0477718	159.56	0.0540435	164.168	0.0470433	163.558	0.0457705
										170.129	0.0498214	172.91	0.0480911	171.828	0.0463432	166.859	0.041695	166.016	0.0469534	168.944	0.0462477	164.591	0.0528394	170.053	0.0503059	167.993	0.0477863	163.273	0.0479765	168.797	0.045944	166.859	0.0537374	161.776	0.044974	166.068	0.0468914	165.593	0.0460188	165.376	0.0474953	164.999	0.048171	161.026	0.0541431	164.758	0.0474101	164.096	0.0461258
										171.008	0.0499461	173.379	0.0484407	172.27	0.0466788	167.907	0.0418688	166.855	0.0470973	169.344	0.0465896	165.546	0.0530609	170.57	0.0507097	168.409	0.0481213	164.117	0.048111	169.309	0.0464341	167.28	0.0540292	162.576	0.0451944	166.48	0.0472163	165.985	0.0462993	165.767	0.0479426	165.399	0.0486076	162.456	0.0543738	165.191	0.0478114	164.491	0.0465144
										171.848	0.0501393	173.665	0.0488109	172.54	0.047034	168.909	0.0421378	167.657	0.0473201	169.588	0.0469515	166.459	0.0534038	170.886	0.0511371	168.662	0.0484759	164.924	0.0483193	169.622	0.046953	167.537	0.054338	163.341	0.0455357	166.732	0.0475604	166.225	0.0465962	166.006	0.0484161	165.644	0.0490698	163.822	0.054731	165.456	0.0482361	164.732	0.0469258
										172.632	0.0503971	173.761	0.0491914	172.631	0.0473992	169.844	0.0424969	168.406	0.0476175	169.67	0.0473236	167.311	0.0538615	170.992	0.0515765	168.748	0.0488404	165.678	0.0485973	169.727	0.0474864	167.624	0.0546555	164.055	0.0459913	166.817	0.047914	166.306	0.0469014	166.086	0.0489029	165.726	0.049545	165.098	0.0552078	165.545	0.0486728	164.813	0.0473488
										173.346	0.0507146	Red	Red	Red	Red	170.695	0.0429391	169.088	0.0479837	Red	Red	168.087	0.0544251	Red	Red	Red	Red	166.364	0.0489396	Red	Red	Red	Red	164.705	0.0465522	Red	Red	Red	Red	Red	Red	Red	Red	166.259	0.0557949	Red	Red	Red	Red
										173.975	0.0510855					171.445	0.0434557	169.689	0.0484115			168.77	0.0550836					166.969	0.0493395					165.278	0.0472076									167.283	0.0564808
										174.507	0.0515027					172.08	0.0440367	170.198	0.0488928			169.349	0.0558241					167.481	0.0497894					165.763	0.0479447									168.149	0.0572523
										174.933	0.0519579					172.587	0.0446708	170.604	0.0494179			169.811	0.0566324					167.889	0.0502803					166.151	0.0487491									168.841	0.0580942
										175.242	0.0524425					172.957	0.0453457	170.9	0.0499769			170.148	0.0574926					168.187	0.0508028					166.433	0.0496053									169.345	0.0589903
										175.431	0.0529469					173.181	0.0460482	171.08	0.0505587			170.352	0.058388					168.368	0.0513466					166.604	0.0504965									169.651	0.059923
										175.494	0.0534612					173.256	0.0467646	171.14	0.051152			170.421	0.0593012					168.429	0.0519013					166.662	0.0514053									169.754	0.0608742
										Red	Red					Red	Red	Red	Red			Red	Red					Red	Red					Red	Red									Red	Red
[truncated: 4 more columns]

## Sheet: PlotDat17
Source sheet	data	167.004	0.0552751	140	0.0469342	178.568	0.0467407	156.227	0.075	175.398	0.0552751	175.21	0.0501868	173.389	0.049102	173.191	0.0496571	170.845	0.0565076	170.959	0.0614944	173.591	0.0485419	171.941	0.0543361	171.65	0.0513923	170.135	0.046676	169.573	0.0557934	169.033	0.0502059	170.745	0.0493814	165.742	0.053049	165.691	0.0512214	167.824	0.0609368	166.556	0.0524411	164.368	0.0475769	166.816	0.0509485	164.694	0.0473225
Plot name	Concordia14	166.65	0.0501868	141.081	0.0469274	173.728	0.0467602	163.393	0.04	175.316	0.0560542	175.173	0.0510347	173.31	0.0498598	173.112	0.0503058	170.783	0.0573206	170.895	0.0624277	173.499	0.0492622	171.906	0.054997	171.568	0.0522336	170.062	0.0475252	169.501	0.0564681	168.957	0.0509333	170.703	0.0501553	165.677	0.0537391	165.623	0.0520234	167.785	0.0616936	166.473	0.0533304	164.305	0.0481962	166.775	0.0517727	164.615	0.0481208
Plot Type	1	165.228	0.049102	142.18	0.0469205	169.143	0.0467798			175.073	0.0568181	175.064	0.0518755	173.073	0.0506029	172.876	0.050942	170.597	0.0581178	170.701	0.063343	173.226	0.0499685	171.801	0.0556522	171.322	0.0530585	169.846	0.0483579	169.288	0.0571297	168.729	0.0516465	170.579	0.0509226	165.484	0.0544159	165.42	0.0528098	167.666	0.062444	166.226	0.0542025	164.118	0.0488034	166.654	0.0525898	164.382	0.0489037
1st free col	55	165.055	0.0496571	143.296	0.0469136	164.793	0.0467993			174.672	0.057552	174.883	0.0527018	172.683	0.0513168	172.488	0.0515531	170.291	0.0588837	170.383	0.0642222	172.775	0.050647	171.628	0.0562962	170.918	0.053851	169.489	0.0491579	168.937	0.0577653	168.355	0.0523316	170.374	0.0516767	165.167	0.055066	165.087	0.0535653	167.471	0.0631815	165.818	0.0550402	163.81	0.0493868	166.453	0.053393	163.998	0.0496557
Sigma Level	1	164.437	0.0565076	144.429	0.0469067	160.661	0.0468189			174.122	0.0582415	174.632	0.0535067	172.149	0.0519875	171.955	0.0521273	169.871	0.0596032	169.947	0.0650483	172.157	0.0512845	171.387	0.0569235	170.363	0.0545957	169	0.0499095	168.454	0.0583625	167.842	0.0529754	170.089	0.0524113	164.732	0.0556768	164.63	0.0542751	167.199	0.0638999	165.259	0.0558274	163.388	0.0499349	166.174	0.0541752	163.471	0.0503623
Absolute Errs	FALSE	164.295	0.0614944	145.581	0.0468998	156.73	0.0468385			173.434	0.0588733	174.312	0.0542833	171.48	0.0526021	171.288	0.0526534	169.346	0.0602626	169.4	0.0658053	171.383	0.0518687	171.08	0.0575287	169.668	0.055278	168.388	0.0505982	167.851	0.0589097	167.199	0.0535653	169.726	0.05312	164.187	0.0562366	164.057	0.0549255	166.854	0.064593	164.559	0.0565486	162.859	0.0504372	165.82	0.05493	162.811	0.0510098
Symbol Type	1	164.154	0.0485419	146.751	0.0468929	152.987	0.0468581			172.62	0.0594351	173.927	0.0550249	170.689	0.0531485	170.499	0.0531212	168.725	0.0608488	168.754	0.0664784	170.469	0.0523881	170.711	0.0581067	168.848	0.0558846	167.665	0.0512106	167.137	0.0593963	166.44	0.0540898	169.289	0.0537968	163.542	0.0567342	163.381	0.0555038	166.438	0.0652549	163.732	0.05719	162.234	0.0508838	165.393	0.0556508	162.031	0.0515855
Inverse Plot	TRUE	163.73	0.0543361	147.94	0.0468861	149.417	0.0468777			171.698	0.0599159	173.481	0.0557252	169.792	0.0536162	169.605	0.0535216	168.02	0.0613506	168.022	0.0670544	169.431	0.0528326	170.283	0.0586525	167.916	0.0564038	166.844	0.0517347	166.328	0.0598127	165.578	0.0545387	168.782	0.054436	162.812	0.0571602	162.613	0.0559988	165.955	0.0658799	162.794	0.0577388	161.525	0.051266	164.897	0.0563314	161.146	0.0520782
Color Plot	TRUE	163.18	0.0513923	149.148	0.0468792	146.01	0.0468973			170.683	0.0603064	172.976	0.0563783	168.806	0.0539961	168.622	0.0538468	167.246	0.0617581	167.216	0.0675222	168.291	0.0531937	169.798	0.0591615	166.893	0.0568255	165.942	0.0521603	165.439	0.0601509	164.631	0.0549033	168.209	0.055032	162.008	0.0575061	161.769	0.0564008	165.41	0.0664628	161.763	0.0581846	160.746	0.0515764	164.336	0.0569662	160.174	0.0524784
3D plot	FALSE	162.669	0.046676	150.376	0.0468723	142.754	0.0469169			169.598	0.060599	172.416	0.0569786	167.75	0.0542806	167.569	0.0540904	166.417	0.0620634	166.354	0.0678727	167.07	0.0534641	169.262	0.0596293	165.797	0.0571414	164.976	0.0524792	164.486	0.0604042	163.618	0.0551764	167.574	0.0555798	161.149	0.0577653	160.866	0.0567019	164.805	0.0669985	160.659	0.0585186	159.912	0.0518089	163.716	0.0575495	159.133	0.0527782
Linear	FALSE	162.212	0.0557934	151.624	0.0468654	IsoLine	IsoLine			168.461	0.0607879	171.808	0.0575209	166.645	0.0544644	166.468	0.0542477	165.549	0.0622606	165.452	0.0680991	165.793	0.0536388	168.678	0.060052	164.651	0.0573455	163.965	0.0526851	163.49	0.0605679	162.557	0.0553528	166.883	0.0560747	160.249	0.0579326	159.921	0.0568964	164.148	0.0674825	159.503	0.0587342	159.039	0.0519591	163.041	0.0580766	158.044	0.0529718
Data Range	T119:W140	161.196	0.0502059	152.894	0.0468586					167.297	0.0608695	171.156	0.0580006	165.513	0.0545438	165.339	0.0543157	164.66	0.0623457	164.528	0.0681969	164.484	0.0537143	168.052	0.0604259	163.475	0.0574336	162.929	0.0527741	162.469	0.0606386	161.47	0.055429	166.143	0.0565125	159.326	0.0580049	158.952	0.0569804	163.443	0.0679107	158.319	0.0588274	158.144	0.052024	162.317	0.0585429	156.927	0.0530555
		161.028	0.0493814	154.184	0.0468517					166.126	0.0608423	170.465	0.0584137	164.375	0.0545173	164.205	0.054293	163.767	0.0623173	163.598	0.0681643	163.168	0.0536891	167.39	0.0607478	162.294	0.0574042	161.889	0.0527444	161.442	0.060615	160.377	0.0554036	165.359	0.0568895	158.4	0.0579808	157.979	0.0569524	162.697	0.0682794	157.129	0.0587963	157.245	0.0520023	161.55	0.0589444	155.805	0.0530275
		159.094	0.053049	155.497	0.0468448					164.973	0.0607067	169.742	0.0587566	163.254	0.0543854	163.087	0.0541801	162.886	0.0621758	162.683	0.0680018	161.871	0.0535637	166.696	0.061015	161.131	0.0572577	160.863	0.0525966	160.431	0.0604975	159.3	0.055277	164.538	0.0572024	157.486	0.0578607	157.019	0.0568128	161.915	0.0685854	155.956	0.0586415	156.359	0.0518945	160.747	0.0592776	154.699	0.0528885
		158.709	0.0512214	156.832	0.046838					163.859	0.0604653	168.992	0.0590264	162.171	0.0541507	162.007	0.0539791	162.036	0.0619239	161.798	0.0677126	160.619	0.0533406	165.977	0.0612253	160.007	0.0569971	159.872	0.0523335	159.454	0.0602885	158.26	0.0550516	163.687	0.0574486	156.604	0.0576469	156.093	0.0565643	161.105	0.0688262	154.823	0.058366	155.504	0.0517027	159.915	0.0595398	153.632	0.0526412
		158.573	0.0609368	158.19	0.0468311					162.807	0.060123	168.223	0.0592207	161.148	0.0538176	160.987	0.053694	161.232	0.0615667	160.963	0.0673025	159.436	0.0530241	165.239	0.0613768	158.945	0.0566274	158.936	0.0519604	158.531	0.059992	157.278	0.054732	162.813	0.057626	155.771	0.0573436	155.218	0.0562119	160.273	0.0689996	153.753	0.0579752	154.695	0.0514306	159.061	0.0597287	152.623	0.0522904
		158.021	0.0524411	159.571	0.0468242					161.836	0.0596863	167.44	0.059338	160.204	0.0533928	160.046	0.0533304	160.491	0.0611109	160.192	0.0667793	158.344	0.0526203	164.487	0.0614682	157.965	0.0561558	158.072	0.0514843	157.68	0.0596138	156.371	0.0543243	161.924	0.057733	155.002	0.0569567	154.41	0.0557624	159.427	0.0691043	152.766	0.0574767	153.949	0.0510834	158.192	0.0598427	151.692	0.0518429
		157.919	0.0475769	160.977	0.0468174					160.966	0.0591637	166.65	0.0593772	159.358	0.0528845	159.203	0.0528952	159.826	0.0605656	159.501	0.0661532	157.366	0.0521371	163.73	0.0614987	157.087	0.0555915	157.298	0.0509147	156.916	0.0591612	155.559	0.0538364	161.028	0.0577688	154.313	0.0564938	153.686	0.0552244	158.573	0.0691393	151.881	0.0568801	153.281	0.050668	157.316	0.0598808	150.857	0.0513074
		157.316	0.0509485	162.408	0.0468105					160.213	0.0585655	165.86	0.059338	158.626	0.0523026	158.473	0.052397	159.252	0.0599413	158.903	0.0654364	156.52	0.051584	162.972	0.0614682	156.327	0.0549455	156.629	0.0502626	156.256	0.058643	154.856	0.0532779	160.131	0.057733	153.717	0.0559638	153.06	0.0546086	157.719	0.0691043	151.116	0.0561972	152.702	0.0501924	156.439	0.0598427	150.136	0.0506943
		156.646	0.0473225	163.864	0.0468037					159.592	0.0579032	165.077	0.0592207	158.022	0.0516584	157.872	0.0518455	158.778	0.0592501	158.411	0.0646429	155.822	0.0509717	162.221	0.0613768	155.701	0.0542303	156.077	0.0495406	155.712	0.0580694	154.277	0.0526595	159.242	0.057626	153.225	0.0553771	152.544	0.0539268	156.873	0.0689996	150.485	0.0554411	152.226	0.0496659	155.57	0.0597287	149.541	0.0500156
		156.315	0.0497642	165.347	0.0467968					159.116	0.0571897	164.307	0.0590264	157.559	0.0509644	157.41	0.0512514	158.414	0.0585056	158.033	0.0637882	155.286	0.050312	161.482	0.0612253	155.22	0.0534598	155.653	0.048763	155.294	0.0574515	153.832	0.0519934	158.368	0.0574486	152.848	0.0547451	152.148	0.0531923	156.041	0.0688262	150	0.0546267	151.86	0.0490988	154.716	0.0595398	149.084	0.0492845
		153.351	0.0505528	166.857	0.0467899					158.793	0.056439	163.558	0.0587566	157.246	0.0502341	157.097	0.0506263	158.168	0.0577222	157.776	0.0628887	154.924	0.049618	160.763	0.061015	154.895	0.0526491	155.366	0.0479447	155.011	0.0568014	153.531	0.0512925	157.517	0.0572024	152.592	0.05408	151.879	0.0524195	155.231	0.0685854	149.672	0.0537697	151.612	0.048502	153.884	0.0592776	148.775	0.0485152
		IsoLine	IsoLine	168.394	0.0467831					158.63	0.0556656	162.834	0.0584137	157.087	0.0494819	156.939	0.0499823	158.043	0.0569151	157.647	0.0619622	154.74	0.0489029	160.07	0.0607478	154.73	0.051814	155.221	0.0471017	154.868	0.0561316	153.378	0.0505705	156.696	0.0568895	152.463	0.0533949	151.743	0.0516234	154.45	0.0682794	149.506	0.0528868	151.487	0.0478873	153.081	0.0589444	148.618	0.0477226
				169.96	0.0467762					158.63	0.0548847	162.144	0.0580006	157.087	0.0487222	156.939	0.0493319	158.043	0.0561001	157.647	0.0610265	154.74	0.0481809	159.407	0.0604259	154.73	0.0509706	155.221	0.0462504	154.868	0.0554552	153.378	0.0498414	155.912	0.0565125	152.463	0.0527031	151.743	0.0508195	153.703	0.0679107	149.506	0.0519953	151.487	0.0472665	152.315	0.0585429	148.618	0.0469223
				171.555	0.0467694					158.793	0.0541113	161.491	0.0575209	157.246	0.0479699	157.097	0.0486879	158.168	0.0552931	157.776	0.0601	154.924	0.0474659	158.781	0.060052	154.895	0.0501355	155.366	0.0454074	155.011	0.0547854	153.531	0.0491193	155.172	0.0560747	152.592	0.0520179	151.879	0.0500233	152.998	0.0674825	149.672	0.0511125	151.612	0.0466517	151.591	0.0580766	148.775	0.0461298
				173.181	0.0467625					159.116	0.0533606	160.883	0.0569786	157.559	0.0472397	157.41	0.0480628	158.414	0.0545097	158.033	0.0592006	155.286	0.0467718	158.198	0.0596293	155.22	0.0493248	155.653	0.0445891	155.294	0.0541352	153.832	0.0484184	154.481	0.0555798	152.848	0.0513529	152.148	0.0492505	152.341	0.0669985	150	0.0502555	151.86	0.0460549	150.916	0.0575495	149.084	0.0453605
				174.837	0.0467557					159.592	0.0526471	160.324	0.0563783	158.022	0.0465457	157.872	0.0474687	158.778	0.0537651	158.411	0.0583458	155.822	0.0461121	157.661	0.0591615	155.701	0.0485543	156.077	0.0438114	155.712	0.0535173	154.277	0.0477523	153.846	0.055032	153.225	0.0507209	152.544	0.0485161	151.736	0.0664628	150.485	0.049441	152.226	0.0454878	150.295	0.0569662	149.541	0.0446294
				176.525	0.0467488					160.213	0.0519848	159.819	0.0557252	158.626	0.0459015	158.473	0.0469172	159.252	0.053074	158.903	0.0575523	156.52	0.0454998	157.177	0.0586525	156.327	0.0478391	156.629	0.0430894	156.256	0.0529437	154.856	0.047134	153.273	0.054436	153.717	0.0501342	153.06	0.0478343	151.191	0.0658799	151.116	0.048685	152.702	0.0449613	149.735	0.0563314	150.136	0.0439507
				178.247	0.046742					160.966	0.0513866	159.372	0.0550249	159.358	0.0453195	159.203	0.046419	159.826	0.0524497	159.501	0.0568355	157.366	0.0449467	156.748	0.0581067	157.087	0.0471931	157.298	0.0424373	156.916	0.0524255	155.559	0.0465754	152.766	0.0537968	154.313	0.0496042	153.686	0.0472185	150.708	0.0652549	151.881	0.048002	153.281	0.0444857	149.239	0.0556508	150.857	0.0433376
				180	0.0467351					161.836	0.050864	158.987	0.0542833	160.204	0.0448112	160.046	0.0459838	160.491	0.0519043	160.192	0.0562095	158.344	0.0444635	156.379	0.0575287	157.965	0.0466288	158.072	0.0418677	157.68	0.0519729	156.371	0.0460876	152.329	0.05312	155.002	0.0491412	154.41	0.0466805	150.292	0.064593	152.766	0.0474055	153.949	0.0440703	148.812	0.05493	151.692	0.0428021
				IsoLine	IsoLine					162.807	0.0504273	158.668	0.0535067	161.148	0.0443864	160.987	0.0456202	161.232	0.0514486	160.963	0.0556862	159.436	0.0440598	156.073	0.0569235	158.945	0.0461572	158.936	0.0413917	158.531	0.0515947	157.278	0.0456798	151.967	0.0524113	155.771	0.0487544	155.218	0.046231	149.947	0.0638999	153.753	0.0469069	154.695	0.0437232	148.457	0.0541752	152.623	0.0423545
										163.859	0.0500849	158.417	0.0527018	162.171	0.0440534	162.007	0.0453351	162.036	0.0510913	161.798	0.0552761	160.619	0.0437432	155.832	0.0562962	160.007	0.0457874	159.872	0.0410185	159.454	0.0512982	158.26	0.0453602	151.681	0.0516767	156.604	0.0484511	156.093	0.0458785	149.675	0.0631815	154.823	0.0465161	155.504	0.043451	148.178	0.053393	153.632	0.0420037
										164.973	0.0498436	158.236	0.0518755	163.254	0.0438186	163.087	0.0451341	162.886	0.0508395	162.683	0.0549869	161.871	0.0435201	155.658	0.0556522	161.131	0.0455268	160.863	0.0407554	160.431	0.0510892	159.3	0.0451349	151.476	0.0509226	157.486	0.0482373	157.019	0.0456301	149.48	0.062444	155.956	0.0462406	156.359	0.0432592	147.977	0.0525898	154.699	0.0417564
										166.126	0.049708	158.127	0.0510347	164.375	0.0436867	164.205	0.0450212	163.767	0.050698	163.598	0.0548245	163.168	0.0433947	155.553	0.054997	162.294	0.0453804	161.889	0.0406076	161.442	0.0509717	160.377	0.0450083	151.352	0.0501553	158.4	0.0481172	157.979	0.0454905	149.362	0.0616936	157.129	0.0460858	157.245	0.0431514	147.856	0.0517727	155.805	0.0416174
										167.297	0.0496807	158.09	0.0501868	165.513	0.0436602	165.339	0.0449985	164.66	0.0506695	164.528	0.0547918	164.484	0.0433695	155.518	0.0543361	163.475	0.045351	162.929	0.0405779	162.469	0.0509481	161.47	0.0449828	151.31	0.0493814	159.326	0.048093	158.952	0.0454624	149.322	0.0609368	158.319	0.0460547	158.144	0.0431297	147.816	0.0509485	156.927	0.0415895
										168.461	0.0497624	158.127	0.0493388	166.645	0.0437396	166.468	0.0450665	165.549	0.0507547	165.452	0.0548896	165.793	0.043445	155.553	0.0536752	164.651	0.0454391	163.965	0.0406669	163.49	0.0510188	162.557	0.045059	151.352	0.0486075	160.249	0.0481653	159.921	0.0455465	149.362	0.06018	159.503	0.0461479	159.039	0.0431946	147.856	0.0501244	158.044	0.0416731
										169.598	0.0499513	158.236	0.048498	167.75	0.0439234	167.569	0.0452238	166.417	0.0509519	166.354	0.055116	167.07	0.0436197	155.658	0.0530199	165.797	0.0456431	164.976	0.0408728	164.486	0.0511825	163.618	0.0452354	151.476	0.0478402	161.149	0.0483327	160.866	0.045741	149.48	0.0594296	160.659	0.0463636	159.912	0.0433448	147.977	0.0493073	159.133	0.0418668
										170.683	0.0502439	158.417	0.0476717	168.806	0.044208	168.622	0.0454674	167.246	0.0512572	167.216	0.0554665	168.291	0.0438902	155.832	0.0523759	166.893	0.0459591	165.942	0.0411917	165.439	0.0514358	164.631	0.0455086	151.681	0.0470861	162.008	0.0485919	161.769	0.0460421	149.675	0.0586921	161.763	0.0466975	160.746	0.0435774	148.178	0.0485041	160.174	0.0421666
										171.698	0.0506343	158.668	0.0468668	169.792	0.0445878	169.605	0.0457926	168.02	0.0516647	168.022	0.0559343	169.431	0.0442512	156.073	0.0517486	167.916	0.0463807	166.844	0.0416174	166.328	0.051774	165.578	0.0458731	151.967	0.0463515	162.812	0.0489378	162.613	0.0464441	149.947	0.0579737	162.794	0.0471433	161.525	0.0438878	148.457	0.0477219	161.146	0.0425667
										172.62	0.0511151	158.987	0.0460902	170.689	0.0450555	170.499	0.046193	168.725	0.0521664	168.754	0.0565104	170.469	0.0446957	156.379	0.0511434	168.848	0.0469	167.665	0.0421415	167.137	0.0521905	166.44	0.046322	152.329	0.0456428	163.542	0.0493637	163.381	0.0469391	150.292	0.0572806	163.732	0.0476922	162.234	0.04427	148.812	0.0469671	162.031	0.0430594
										173.434	0.0516769	159.372	0.0453486	171.48	0.045602	171.288	0.0466608	169.346	0.0527527	169.4	0.0571834	171.383	0.0452151	156.748	0.0505654	169.668	0.0475066	168.388	0.0427538	167.851	0.052677	167.199	0.0468465	152.766	0.044966	164.187	0.0498614	164.057	0.0475174	150.708	0.0566188	164.559	0.0483335	162.859	0.0447166	149.239	0.0462463	162.811	0.0436351
										174.122	0.0523087	159.819	0.0446483	172.149	0.0462165	171.955	0.0471869	169.871	0.053412	169.947	0.0579404	172.157	0.0457993	157.177	0.0500196	170.363	0.0481889	169	0.0434425	168.454	0.0532242	167.842	0.0474364	153.273	0.0443269	164.732	0.0504211	164.63	0.0481678	151.191	0.0559937	165.259	0.0490547	163.388	0.0452188	149.735	0.0455657	163.471	0.0442826
										174.672	0.0529983	160.324	0.0439952	172.683	0.0468873	172.488	0.0477611	170.291	0.0541316	170.383	0.0587665	172.775	0.0464368	157.661	0.0495106	170.918	0.0489336	169.489	0.0441942	168.937	0.0538214	168.355	0.0480802	153.846	0.0437309	165.167	0.051032	165.087	0.0488776	151.736	0.0554108	165.818	0.0498419	163.81	0.045767	150.295	0.0449309	163.998	0.0449892
										175.073	0.0537322	160.883	0.0433949	173.073	0.0476011	172.876	0.0483722	170.597	0.0548974	170.701	0.0596458	173.226	0.0471153	158.198	0.0490428	171.322	0.0497261	169.846	0.0449941	169.288	0.054457	168.729	0.0487654	154.481	0.0431831	165.484	0.0516821	165.42	0.0496331	152.341	0.0548751	166.226	0.0506797	164.118	0.0463503	150.916	0.0443476	164.382	0.0457413
										175.316	0.0544961	161.491	0.0428526	173.31	0.0483442	173.112	0.0490084	170.783	0.0556946	170.895	0.060561	173.499	0.0478216	158.781	0.0486202	171.568	0.050551	170.062	0.0458268	169.501	0.0551186	168.957	0.0494786	155.172	0.0426881	165.677	0.0523588	165.623	0.0504195	152.998	0.0543911	166.473	0.0515517	164.305	0.0469576	151.591	0.0438205	164.615	0.0465241
										175.398	0.0552751	162.144	0.0423729	173.389	0.049102	173.191	0.0496571	170.845	0.0565076	170.959	0.0614944	173.591	0.0485419	159.407	0.0482463	171.65	0.0513923	170.135	0.046676	169.573	0.0557934	169.033	0.0502059	155.912	0.0422503	165.742	0.053049	165.691	0.0512214	153.703	0.0539629	166.556	0.0524411	164.368	0.0475769	152.315	0.0433542	164.694	0.0473225
										Red	Red	162.834	0.0419598	Red	Red	Red	Red	Red	Red	Red	Red	Red	Red	160.07	0.0479243	Red	Red	Red	Red	Red	Red	Red	Red	156.696	0.0418733	Red	Red	Red	Red	154.45	0.0535943	Red	Red	Red	Red	153.081	0.0429527	Red	Red
												163.558	0.0416169											160.763	0.0476571									157.517	0.0415604					155.231	0.0532882					153.884	0.0426195
												164.307	0.0413472											161.482	0.0474469									158.368	0.0413142					156.041	0.0530475					154.716	0.0423573
												165.077	0.0411528											162.221	0.0472954									159.242	0.0411368					156.873	0.052874					155.57	0.0421684
												165.86	0.0410355											162.972	0.047204									160.131	0.0410298					157.719	0.0527693					156.439	0.0420544
												166.65	0.0409963											163.73	0.0471734									161.028	0.040994					158.573	0.0527343					157.316	0.0420163
												167.44	0.0410355											164.487	0.047204									161.924	0.0410298					159.427	0.0527693					158.192	0.0420544
												168.223	0.0411528											165.239	0.0472954									162.813	0.0411368					160.273	0.052874					159.061	0.0421684
												168.992	0.0413472											165.977	0.0474469									163.687	0.0413142					161.105	0.0530475					159.915	0.0423573
												169.742	0.0416169											166.696	0.0476571									164.538	0.0415604					161.915	0.0532882					160.747	0.0426195
												170.465	0.0419598											167.39	0.0479243									165.359	0.0418733					162.697	0.0535943					161.55	0.0429527
												171.156	0.0423729											168.052	0.0482463									166.143	0.0422503					163.443	0.0539629					162.317	0.0433542
												171.808	0.0428526											168.678	0.0486202									166.883	0.0426881					164.148	0.0543911					163.041	0.0438205
												172.416	0.0433949											169.262	0.0490428									167.574	0.0431831					164.805	0.0548751					163.716	0.0443476
												172.976	0.0439952											169.798	0.0495106									168.209	0.0437309					165.41	0.0554108					164.336	0.0449309
												173.481	0.0446483											170.283	0.0500196									168.782	0.0443269					165.955	0.0559937					164.897	0.0455657
												173.927	0.0453486											170.711	0.0505654									169.289	0.044966					166.438	0.0566188					165.393	0.0462463
												174.312	0.0460902											171.08	0.0511434									169.726	0.0456428					166.854	0.0572806					165.82	0.0469671
												174.632	0.0468668											171.387	0.0517486									170.089	0.0463515					167.199	0.0579737					166.174	0.0477219
												174.883	0.0476717											171.628	0.0523759									170.374	0.0470861					167.471	0.0586921					166.453	0.0485041
												175.064	0.048498											171.801	0.0530199									170.579	0.0478402					167.666	0.0594296					166.654	0.0493073
												175.173	0.0493388											171.906	0.0536752									170.703	0.0486075					167.785	0.06018					166.775	0.0501244
												175.21	0.0501868											171.941	0.0543361									170.745	0.0493814					167.824	0.0609368					166.816	0.0509485
												Red	Red											Red	Red									Red	Red					Red	Red					Red	Red
[truncated: 4 more columns]

## Sheet: PlotDat1
Source sheet	data	0.169207	0.0247725	0.159482	0.0235416	0.165215	0.0243358	0.170977	0.0251306	0.176767	0.025926	0.182585	0.026722	0.156	0.0230964	0.156	0.023056	0.156	0.0231369	0.159197	0.0235416	0.17842	0.0259451	0.178188	0.0258321	0.178283	0.0259329	0.177851	0.0260018	0.177347	0.0259548	0.181916	0.0263326	0.181884	0.0263185	0.180433	0.0264816	0.174506	0.0255255
Plot name	Concordia1	0.171208	0.0249766	0.15947	0.0235504	0.165203	0.0243449	0.170964	0.02514	0.176754	0.0259357	0.182572	0.026732	0.156	0.0230964	0.156	0.023056	0.156	0.0231369	0.164919	0.0243358	0.178323	0.0259964	0.178086	0.0258813	0.178207	0.025984	0.177773	0.0260541	0.177268	0.0260147	0.181837	0.0263841	0.181807	0.0263677	0.180318	0.0265306	0.174445	0.0255495
Plot Type	1	0.171177	0.0251143	0.159437	0.0235584	0.165168	0.0243532	0.170928	0.0251486	0.176716	0.0259446	0.182533	0.0267412	0.156964	0.0232308	0.156964	0.0231901	0.156964	0.0232715	0.17067	0.0251306	0.178048	0.0260238	0.177796	0.0259059	0.177994	0.0260182	0.177555	0.0260891	0.177047	0.0260582	0.181615	0.0264178	0.181592	0.0263995	0.179994	0.0265509	0.174272	0.0255588
1st free col	41	0.17058	0.0251578	0.159384	0.0235652	0.165113	0.0243601	0.170871	0.0251558	0.176657	0.025952	0.182472	0.0267488	0.157929	0.0233652	0.157929	0.0233243	0.157929	0.0234061	0.176449	0.025926	0.1776	0.0260269	0.177326	0.0259051	0.177649	0.0260348	0.177202	0.0261059	0.176688	0.0260844	0.181254	0.026433	0.181242	0.0264134	0.17947	0.0265419	0.173994	0.0255528
Sigma Level	1	0.169977	0.0251683	0.159315	0.0235699	0.165042	0.0243651	0.170797	0.0251609	0.176581	0.0259573	0.182393	0.0267543	0.158895	0.0234996	0.158895	0.0234584	0.158895	0.0235407	0.182256	0.026722	0.17699	0.0260056	0.176689	0.0258789	0.177177	0.0260335	0.176719	0.0261042	0.176199	0.0260927	0.180762	0.0264294	0.180765	0.0264089	0.178759	0.026504	0.173624	0.025532
Absolute Errs	FALSE	0.174495	0.0254675	0.159238	0.0235725	0.164961	0.0243677	0.170713	0.0251636	0.176494	0.02596	0.182303	0.0267571	0.159861	0.023634	0.159861	0.0235926	0.159861	0.0236753	IsoLine	IsoLine	0.176228	0.0259602	0.175902	0.0258282	0.176589	0.0260143	0.176117	0.0260842	0.175589	0.026083	0.180148	0.026407	0.180169	0.0263862	0.177881	0.0264381	0.173178	0.0254972
Symbol Type	1	0.174689	0.0254744	0.159156	0.0235725	0.164877	0.0243677	0.170626	0.0251636	0.176403	0.02596	0.182209	0.0267571	0.160829	0.0237684	0.160829	0.0237268	0.160829	0.02381			0.175329	0.0258918	0.174988	0.0257542	0.175895	0.0259776	0.175407	0.0260461	0.17487	0.0260555	0.179424	0.0263664	0.179467	0.0263459	0.17686	0.026346	0.172676	0.02545
Inverse Plot	FALSE	0.172638	0.0254785	0.159079	0.0235699	0.164796	0.0243651	0.170542	0.0251609	0.176316	0.0259573	0.182119	0.0267543	0.161797	0.0239028	0.161797	0.023861	0.161797	0.0239447			0.174312	0.0258015	0.17397	0.0256591	0.17511	0.025924	0.174604	0.0259907	0.174055	0.0260108	0.178603	0.0263083	0.178672	0.0262885	0.175724	0.0262302	0.172138	0.0253923
Color Plot	TRUE	IsoLine	IsoLine	0.15901	0.0235652	0.164725	0.0243601	0.170469	0.0251558	0.17624	0.025952	0.18204	0.0267488	0.162766	0.0240373	0.162766	0.0239952	0.162766	0.0240794			0.173194	0.0256913	0.172877	0.0255453	0.174248	0.0258548	0.173722	0.0259191	0.173161	0.0259497	0.177703	0.0262338	0.177799	0.0262153	0.174504	0.0260939	0.17159	0.0253268
3D plot	FALSE			0.158957	0.0235584	0.16467	0.0243532	0.170411	0.0251486	0.176181	0.0259446	0.181979	0.0267412	0.163736	0.0241718	0.163736	0.0241295	0.163736	0.0242141			0.172	0.0255631	0.171739	0.0254159	0.173326	0.0257711	0.172778	0.0258327	0.172205	0.0258733	0.176741	0.0261444	0.176866	0.0261277	0.173233	0.0259409	0.171054	0.0252562
Linear	FALSE			0.158923	0.0235504	0.164635	0.0243449	0.170375	0.02514	0.176143	0.0259357	0.18194	0.026732	0.164706	0.0243063	0.164706	0.0242637	0.164706	0.0243488			0.170751	0.0254196	0.170586	0.0252746	0.172363	0.0256746	0.171792	0.0257331	0.171206	0.0257833	0.175734	0.0260419	0.175891	0.0260273	0.171945	0.0257752	0.170554	0.0251837
Data Range	E23:I30			0.158912	0.0235416	0.164623	0.0243358	0.170363	0.0251306	0.17613	0.025926	0.181927	0.026722	0.165678	0.0244408	0.165678	0.024398	0.165678	0.0244836			0.169471	0.0252635	0.16945	0.0251252	0.171376	0.0255672	0.170783	0.0256224	0.170182	0.0256812	0.174704	0.0259281	0.174892	0.0259162	0.170677	0.0256015	0.170113	0.0251125
				0.158923	0.0235328	0.164635	0.0243267	0.170375	0.0251212	0.176143	0.0259163	0.18194	0.0267121	0.16665	0.0245753	0.16665	0.0245323	0.16665	0.0246184			0.168187	0.0250978	0.168362	0.0249717	0.170386	0.025451	0.169769	0.0255026	0.169155	0.0255692	0.17367	0.0258054	0.173889	0.0257965	0.169462	0.0254244	0.169748	0.0250456
				0.158957	0.0235247	0.16467	0.0243183	0.170411	0.0251126	0.176181	0.0259074	0.181979	0.0267029	0.167623	0.0247099	0.167623	0.0246666	0.167623	0.0247532			0.166923	0.0249258	0.167352	0.0248184	0.169411	0.0253283	0.168772	0.0253761	0.168144	0.0254494	0.172651	0.0256761	0.172901	0.0256706	0.168334	0.0252488	0.169477	0.024986
				0.15901	0.023518	0.164725	0.0243114	0.170469	0.0251054	0.17624	0.0259	0.18204	0.0266953	0.168597	0.0248444	0.168597	0.0248009	0.168597	0.024888			0.165703	0.0247508	0.166446	0.0246694	0.16847	0.0252014	0.167809	0.0252453	0.167168	0.0253241	0.171669	0.0255428	0.171949	0.0255408	0.167323	0.0250794	0.169311	0.0249362
				0.159079	0.0235132	0.164796	0.0243064	0.170542	0.0251003	0.176316	0.0258947	0.182119	0.0266898	0.169571	0.024979	0.169571	0.0249353	0.169571	0.0250228			0.164551	0.0245762	0.165671	0.0245287	0.167582	0.0250727	0.1669	0.0251129	0.166247	0.0251958	0.170741	0.025408	0.171049	0.0254097	0.166457	0.0249209	0.169258	0.0248985
				0.159156	0.0235107	0.164877	0.0243038	0.170626	0.0250976	0.176403	0.025892	0.182209	0.026687	0.170547	0.0251136	0.170547	0.0250696	0.170547	0.0251576			0.16349	0.0244054	0.165047	0.0244003	0.166764	0.0249449	0.166063	0.0249813	0.165399	0.0250669	0.169887	0.0252743	0.170221	0.0252799	0.165759	0.0247777	0.169319	0.0248745
				0.159238	0.0235107	0.164961	0.0243038	0.170713	0.0250976	0.176494	0.025892	0.182303	0.026687	0.171523	0.0252483	0.171523	0.025204	0.171523	0.0252925			0.16254	0.0242418	0.16459	0.0242875	0.166032	0.0248204	0.165314	0.0248531	0.16464	0.02494	0.169122	0.0251444	0.16948	0.0251539	0.16525	0.0246535	0.169492	0.0248653
				0.159315	0.0235132	0.165042	0.0243064	0.170797	0.0251003	0.176581	0.0258947	0.182393	0.0266898	0.1725	0.0253829	0.1725	0.0253384	0.1725	0.0254274			0.16172	0.0240885	0.164315	0.0241936	0.1654	0.0247017	0.164667	0.0247309	0.163984	0.0248176	0.168462	0.0250208	0.168839	0.0250341	0.164942	0.0245519	0.169769	0.0248712
				0.159384	0.023518	0.165113	0.0243114	0.170871	0.0251054	0.176657	0.0259	0.182472	0.0266953	0.173478	0.0255176	0.173478	0.0254728	0.173478	0.0255623			0.161046	0.0239485	0.164227	0.024121	0.16488	0.0245909	0.164136	0.024617	0.163446	0.024702	0.167919	0.0249059	0.168313	0.0249228	0.164843	0.0244755	0.170139	0.024892
				0.159437	0.0235247	0.165168	0.0243183	0.170928	0.0251126	0.176716	0.0259074	0.182533	0.0267029	0.174457	0.0256522	0.174457	0.0256073	0.174457	0.0256972			0.16053	0.0238246	0.16433	0.0240718	0.164483	0.0244903	0.16373	0.0245137	0.163034	0.0245954	0.167504	0.024802	0.167911	0.0248224	0.164958	0.0244265	0.170585	0.0249268
				0.15947	0.0235328	0.165203	0.0243267	0.170964	0.0251212	0.176754	0.0259163	0.182572	0.0267121	0.175436	0.0257869	0.175436	0.0257417	0.175436	0.0258321			0.160184	0.0237191	0.16462	0.0240473	0.164217	0.0244019	0.163457	0.0244228	0.162758	0.0245	0.167226	0.0247109	0.167641	0.0247346	0.165282	0.0244062	0.171088	0.0249741
				0.159482	0.0235416	0.165215	0.0243358	0.170977	0.0251306	0.176767	0.025926	0.182585	0.026722	0.176417	0.0259216	0.176417	0.0258762	0.176417	0.0259671			0.160013	0.0236341	0.16509	0.0240481	0.164085	0.0243274	0.163323	0.0243463	0.162622	0.0244177	0.167089	0.0246346	0.167508	0.0246612	0.165806	0.0244151	0.171625	0.0250317
				ConcTikEll	ConcTikEll	ConcTikEll	ConcTikEll	ConcTikEll	ConcTikEll	ConcTikEll	ConcTikEll	ConcTikEll	ConcTikEll	0.177398	0.0260564	0.177398	0.0260107	0.177398	0.026102			0.160021	0.0235713	0.165727	0.0240742	0.164092	0.0242681	0.16333	0.0242855	0.162629	0.0243499	0.167096	0.0245746	0.167515	0.0246036	0.166517	0.0244531	0.172174	0.0250973
														0.17838	0.0261911	0.17838	0.0261452	0.17838	0.026237			0.160207	0.0235318	0.166513	0.0241249	0.164237	0.0242254	0.163478	0.0242418	0.162779	0.0242981	0.167247	0.0245319	0.167661	0.024563	0.167395	0.024519	0.172709	0.0251678
														0.179363	0.0263259	0.179363	0.0262797	0.179363	0.026372			0.160569	0.0235165	0.167428	0.0241989	0.164517	0.0241999	0.163764	0.0242159	0.16307	0.0242632	0.167539	0.0245074	0.167944	0.0245401	0.168416	0.0246111	0.173209	0.0252403
														0.180346	0.0264607	0.180346	0.0264143	0.180346	0.026507			0.1611	0.0235257	0.168445	0.0242941	0.164926	0.0241922	0.164183	0.0242083	0.163494	0.0242459	0.167966	0.0245016	0.168359	0.0245354	0.169552	0.0247269	0.173651	0.0253116
														0.181331	0.0265955	0.181331	0.0265488	0.181331	0.0266421			0.161787	0.0235591	0.169538	0.0244079	0.165457	0.0242025	0.164727	0.0242191	0.164045	0.0242466	0.168521	0.0245146	0.168896	0.024549	0.170772	0.0248631	0.174015	0.0253785
														0.182316	0.0267303	0.182316	0.0266834	0.182316	0.0267771			0.16262	0.0236161	0.170676	0.0245372	0.1661	0.0242305	0.165384	0.0242483	0.164712	0.0242652	0.169192	0.0245461	0.169547	0.0245806	0.172043	0.0250162	0.174286	0.0254381
														0.183302	0.0268651	0.183302	0.026818	0.183302	0.0269122			0.16358	0.0236956	0.171829	0.0246785	0.166841	0.0242758	0.166143	0.0242952	0.165481	0.0243014	0.169966	0.0245956	0.170297	0.0246296	0.173331	0.0251818	0.174452	0.0254878
														0.184289	0.027	0.184289	0.0269526	0.183944	0.027			0.16465	0.0237961	0.172965	0.0248279	0.167667	0.0243373	0.166988	0.0243588	0.166337	0.0243544	0.170828	0.024662	0.171133	0.024695	0.174599	0.0253556	0.174506	0.0255255
														0.184289	0.027	0.184637	0.027	ConcBand	ConcBand			0.165809	0.0239156	0.174053	0.0249814	0.168561	0.024414	0.167903	0.024438	0.167264	0.0244233	0.171762	0.0247442	0.172038	0.0247757	0.175814	0.0255327
														IsoLine	IsoLine	ConcBand	ConcBand					0.167034	0.0240518	0.175064	0.0251347	0.169506	0.0245043	0.16887	0.0245312	0.168244	0.0245067	0.172749	0.0248404	0.172995	0.0248699	0.176942	0.0257083
																						0.168301	0.024202	0.175969	0.0252838	0.170483	0.0246065	0.16987	0.0246366	0.169258	0.024603	0.173769	0.0249488	0.173985	0.0249758	0.177953	0.0258777
																						0.169586	0.0243633	0.176744	0.0254244	0.171474	0.0247185	0.170884	0.0247522	0.170286	0.0247103	0.174804	0.0250673	0.174988	0.0250915	0.178819	0.0260361
																						0.170864	0.0245326	0.177369	0.0255529	0.172459	0.0248383	0.171892	0.0248756	0.171308	0.0248265	0.175833	0.0251936	0.175986	0.0252147	0.179517	0.0261794
																						0.172109	0.0247065	0.177825	0.0256656	0.173419	0.0249634	0.172875	0.0250046	0.172304	0.0249494	0.176836	0.0253253	0.176958	0.0253428	0.180026	0.0263036
																						0.173297	0.0248817	0.178101	0.0257595	0.174336	0.0250915	0.173812	0.0251365	0.173254	0.0250765	0.177793	0.0254597	0.177886	0.0254736	0.180334	0.0264052
																						0.174407	0.0250548	0.178188	0.0258321	0.175191	0.02522	0.174687	0.0252688	0.174141	0.0252054	0.178687	0.0255942	0.178752	0.0256044	0.180433	0.0264816
																						0.175415	0.0252224	Red	Red	0.175968	0.0253465	0.175482	0.025399	0.174947	0.0253336	0.179498	0.0257263	0.179539	0.0257326	Red	Red
																						0.176302	0.0253813			0.176652	0.0254684	0.176182	0.0255245	0.175656	0.0254586	0.180212	0.0258534	0.180232	0.0258558
																						0.177051	0.0255283			0.177229	0.0255835	0.176773	0.0256428	0.176254	0.0255779	0.180815	0.0259729	0.180816	0.0259716
																						0.177647	0.0256605			0.177688	0.0256894	0.177243	0.0257517	0.176731	0.0256892	0.181295	0.0260826	0.181281	0.0260777
																						0.178079	0.0257755			0.178021	0.0257841	0.177583	0.0258491	0.177075	0.0257904	0.181643	0.0261804	0.181618	0.0261721
																						0.178339	0.025871			0.178221	0.0258658	0.177787	0.025933	0.177282	0.0258795	0.181851	0.0262642	0.181821	0.0262529
																						0.17842	0.0259451			0.178283	0.0259329	0.177851	0.0260018	0.177347	0.0259548	0.181916	0.0263326	0.181884	0.0263185
																						Red	Red			Red	Red	Red	Red	Red	Red	Red	Red	Red	Red

## Sheet: PlotDat2
Source sheet	data	0.389451	0.05313	0.371186	0.0508927	0.377967	0.0517081	0.38478	0.0525242	0.391627	0.0533409	0.398508	0.0541582	0.405423	0.0549761	0.412373	0.0557947	0.419356	0.0566139	0.365	0.0502312	0.365	0.0501421	0.365	0.0503203	0.370468	0.0508927	0.405024	0.0549256	0.404435	0.054997	0.408949	0.0552485	0.40606	0.0553308	0.412383	0.0555641	0.404487	0.0554225	0.408467	0.0554234	0.40964	0.0556141	0.411645	0.0556355	0.410355	0.0557165	0.411342	0.0556816
Plot name	Concordia2	0.388939	0.0531801	0.371157	0.050912	0.377937	0.0517277	0.38475	0.052544	0.391596	0.053361	0.398477	0.0541787	0.405391	0.0549969	0.41234	0.0558158	0.419323	0.0566354	0.365	0.0502312	0.365	0.0501421	0.365	0.0503203	0.377233	0.0517081	0.40486	0.0550143	0.404273	0.0550816	0.408779	0.0553505	0.405891	0.055424	0.412146	0.0556321	0.404269	0.0554922	0.408301	0.0555161	0.409416	0.0556774	0.411466	0.0557351	0.410142	0.0557614	0.411122	0.055755
Plot Type	1	0.392872	0.0534816	0.371072	0.0509296	0.37785	0.0517457	0.384661	0.0525623	0.391506	0.0533796	0.398385	0.0541975	0.405297	0.0550161	0.412244	0.0558353	0.419225	0.0566551	0.366921	0.0504639	0.366921	0.0503744	0.366921	0.0505534	0.384031	0.0525242	0.404397	0.0550663	0.403811	0.0551291	0.4083	0.0554162	0.405414	0.0554795	0.411464	0.0556419	0.403643	0.0555081	0.407831	0.0555719	0.408774	0.0556853	0.410959	0.0557951	0.409526	0.0557523	0.41049	0.0557752
1st free col	65	0.390047	0.0534863	0.370938	0.0509443	0.377713	0.0517606	0.384522	0.0525775	0.391364	0.053395	0.398239	0.0542132	0.405149	0.055032	0.412093	0.0558514	0.419071	0.0566715	0.368845	0.0506966	0.368845	0.0506067	0.368845	0.0507865	0.390863	0.0533409	0.403642	0.0550806	0.403061	0.0551388	0.40752	0.0554442	0.404638	0.0554962	0.410356	0.0555932	0.402627	0.0554698	0.407065	0.0555898	0.407731	0.0556377	0.410134	0.0558143	0.408525	0.0556894	0.409464	0.0557414
Sigma Level	1	0.395854	0.0534983	0.370766	0.0509548	0.377538	0.0517713	0.384342	0.0525884	0.391181	0.0534061	0.398053	0.0542244	0.404959	0.0550434	0.411899	0.055863	0.418874	0.0566832	0.370772	0.0509294	0.370772	0.0508391	0.370772	0.0510198	0.397729	0.0541582	0.402611	0.0550569	0.402035	0.0551103	0.406456	0.055434	0.403578	0.0554738	0.408853	0.0554874	0.401249	0.0553783	0.40602	0.0555693	0.406316	0.055536	0.409007	0.0557923	0.407165	0.0555744	0.408073	0.0556547
Absolute Errs	FALSE	0.389341	0.0535209	0.37057	0.0509603	0.377337	0.0517769	0.384138	0.052594	0.390972	0.0534118	0.39784	0.0542302	0.404742	0.0550493	0.411678	0.055869	0.418648	0.0566893	0.372701	0.0511623	0.372701	0.0510715	0.372701	0.051253	0.404629	0.0549761	0.401324	0.0549957	0.400755	0.0550442	0.405127	0.0553858	0.402254	0.0554126	0.406995	0.0553273	0.399546	0.0552362	0.404715	0.0555108	0.404567	0.0553828	0.407601	0.0557296	0.405484	0.0554104	0.406353	0.0555174
Symbol Type	1	0.392677	0.0536207	0.370365	0.0509603	0.377128	0.0517769	0.383925	0.052594	0.390755	0.0534118	0.397618	0.0542302	0.404516	0.0550493	0.411448	0.055869	0.418413	0.0566893	0.374633	0.0513952	0.374633	0.051304	0.374633	0.0514863	0.411563	0.0557947	0.399806	0.0548983	0.399244	0.0549419	0.403559	0.0553005	0.400693	0.055314	0.404833	0.0551173	0.397564	0.0550472	0.403175	0.0554156	0.402532	0.0551824	0.405941	0.0556274	0.403528	0.055202	0.404352	0.0553333
Inverse Plot	FALSE	0.39408	0.0536507	0.370169	0.0509548	0.376928	0.0517713	0.38372	0.0525884	0.390546	0.0534061	0.397406	0.0542244	0.404299	0.0550434	0.411226	0.055863	0.418188	0.0566832	0.376568	0.0516281	0.376568	0.0515365	0.376568	0.0517197	0.418531	0.0566139	0.398086	0.0547664	0.397533	0.0548053	0.401784	0.0551799	0.398925	0.0551798	0.402427	0.0548632	0.395358	0.0548167	0.401432	0.0552855	0.400267	0.0549401	0.404061	0.0554876	0.40135	0.0549547	0.402125	0.0551074
Color Plot	TRUE	0.394623	0.0536991	0.369997	0.0509443	0.376752	0.0517606	0.383541	0.0525775	0.390363	0.053395	0.397219	0.0542132	0.404109	0.055032	0.411033	0.0558514	0.41799	0.0566715	0.378505	0.0518611	0.378505	0.0517691	0.378505	0.0519531	IsoLine	IsoLine	0.396199	0.0546026	0.395655	0.054637	0.399835	0.0550262	0.396984	0.0550127	0.399841	0.0545718	0.392988	0.0545508	0.399517	0.0551229	0.397833	0.0546627	0.401998	0.055313	0.399009	0.0546754	0.399733	0.0548458
3D plot	FALSE	0.39539	0.0537797	0.369863	0.0509296	0.376616	0.0517457	0.383401	0.0525623	0.390221	0.0533796	0.397074	0.0541975	0.403961	0.0550161	0.410882	0.0558353	0.417836	0.0566551	0.380445	0.0520941	0.380445	0.0520017	0.380445	0.0521866			0.39418	0.0544102	0.393646	0.0544404	0.39775	0.0548424	0.394907	0.0548158	0.397146	0.0542512	0.390519	0.0542568	0.39747	0.0549311	0.395296	0.0543578	0.399791	0.055107	0.39657	0.0543717	0.39724	0.0545556
Linear	FALSE	0.396051	0.0538002	0.369778	0.050912	0.376529	0.0517277	0.383313	0.052544	0.390131	0.053361	0.396982	0.0541787	0.403867	0.0549969	0.410786	0.0558158	0.417739	0.0566354	0.382388	0.0523272	0.382388	0.0522344	0.382388	0.0524201			0.392068	0.0541929	0.391545	0.0542193	0.395571	0.0546321	0.392737	0.0545931	0.394416	0.05391	0.388018	0.0539427	0.39533	0.0547138	0.392726	0.0540335	0.397483	0.0548736	0.394098	0.0540519	0.394714	0.0542449
Data Range	E4:I20	0.399492	0.0538061	0.369749	0.0508927	0.376499	0.0517081	0.383283	0.0525242	0.3901	0.0533409	0.39695	0.0541582	0.403835	0.0549761	0.410753	0.0557947	0.417705	0.0566139	0.384334	0.0525604	0.384334	0.0524671	0.384334	0.0526537			0.389906	0.0539549	0.389394	0.0539779	0.393339	0.0543994	0.390513	0.0543488	0.391726	0.0535576	0.385552	0.0536171	0.393137	0.0544753	0.390193	0.0536988	0.39512	0.0546174	0.391662	0.0537246	0.392225	0.0539221
		0.397143	0.0539117	0.369778	0.0508735	0.376529	0.0516886	0.383313	0.0525043	0.390131	0.0533207	0.396982	0.0541377	0.403867	0.0549553	0.410786	0.0557735	0.417739	0.0565924	0.386282	0.0527936	0.386282	0.0526999	0.386282	0.0528873			0.387735	0.0537008	0.387234	0.053721	0.391098	0.0541489	0.388281	0.0540878	0.389147	0.0532036	0.38319	0.053289	0.390936	0.0542201	0.387766	0.0533627	0.392747	0.0543432	0.389327	0.0533988	0.38984	0.0535959
		0.400398	0.05423	0.369863	0.0508558	0.376616	0.0516706	0.383401	0.052486	0.390221	0.0533021	0.397074	0.0541188	0.403961	0.0549361	0.410882	0.0557541	0.417836	0.0565727	0.388233	0.0530268	0.388233	0.0529327	0.388233	0.053121			0.385598	0.0534356	0.385107	0.0534536	0.388891	0.0538854	0.386083	0.053815	0.386752	0.0528576	0.380996	0.0529671	0.388769	0.0539532	0.385511	0.0530345	0.390411	0.0540566	0.387158	0.0530834	0.387625	0.0532753
		0.394692	0.0542301	0.369997	0.0508411	0.376752	0.0516557	0.383541	0.0524708	0.390363	0.0532867	0.397219	0.0541031	0.404109	0.0549202	0.411033	0.055738	0.41799	0.0565563	0.390187	0.0532601	0.390187	0.0531656	0.390187	0.0533547			0.383535	0.0531645	0.383054	0.0531808	0.386762	0.053614	0.383963	0.0535358	0.384605	0.0525291	0.379029	0.0526603	0.386677	0.0536798	0.38349	0.0527232	0.388156	0.0537629	0.385213	0.052787	0.385639	0.052969
		0.400547	0.0542341	0.370169	0.0508306	0.376928	0.051645	0.38372	0.05246	0.390546	0.0532756	0.397406	0.0540919	0.404299	0.0549089	0.411226	0.0557264	0.418188	0.0565446	0.392144	0.0534935	0.392144	0.0533985	0.392144	0.0535885			0.381588	0.0528927	0.381116	0.052908	0.384752	0.0533401	0.38196	0.0532557	0.382765	0.052227	0.377344	0.052377	0.384703	0.0534053	0.381758	0.0524371	0.386028	0.0534681	0.383546	0.0525177	0.383938	0.0526854
		0.398412	0.0543016	0.370365	0.0508251	0.377128	0.0516394	0.383925	0.0524543	0.390755	0.0532699	0.397618	0.0540861	0.404516	0.0549029	0.411448	0.0557204	0.418413	0.0565385	0.394103	0.0537269	0.394103	0.0536315	0.394103	0.0538223			0.379793	0.0526255	0.379331	0.0526406	0.3829	0.0530689	0.380116	0.05298	0.381282	0.0519596	0.375986	0.0521249	0.382884	0.053135	0.380362	0.0521841	0.384066	0.0531777	0.382202	0.0522828	0.382567	0.0524322
		IsoLine	IsoLine	0.37057	0.0508251	0.377337	0.0516394	0.384138	0.0524543	0.390972	0.0532699	0.39784	0.0540861	0.404742	0.0549029	0.411678	0.0557204	0.418648	0.0565385	0.396065	0.0539604	0.396065	0.0538645	0.396065	0.0540562			0.378187	0.0523682	0.377732	0.0523836	0.381242	0.0528057	0.378464	0.0527142	0.380197	0.0517342	0.374992	0.0519109	0.381255	0.0528742	0.37934	0.0519712	0.382311	0.0528975	0.381218	0.0520887	0.381563	0.0522163
				0.370766	0.0508306	0.377538	0.051645	0.384342	0.05246	0.391181	0.0532756	0.398053	0.0540919	0.404959	0.0549089	0.411899	0.0557264	0.418874	0.0565446	0.39803	0.0541939	0.39803	0.0540976	0.39803	0.0542901			0.3768	0.0521257	0.376352	0.0521422	0.37981	0.0525557	0.377038	0.0524634	0.379538	0.0515569	0.374389	0.0517408	0.379848	0.0526279	0.378721	0.051804	0.380794	0.0526329	0.38062	0.0519408	0.380955	0.0520436
				0.370938	0.0508411	0.377713	0.0516557	0.384522	0.0524708	0.391364	0.0532867	0.398239	0.0541031	0.405149	0.0549202	0.412093	0.055738	0.419071	0.0565563	0.399998	0.0544274	0.399998	0.0543307	0.399998	0.0545241			0.375659	0.0519027	0.375216	0.0519209	0.378633	0.0523237	0.375865	0.0522326	0.379325	0.0514325	0.374195	0.0516193	0.378692	0.0524009	0.37852	0.0516872	0.379547	0.052389	0.380425	0.051843	0.380759	0.0519189
				0.371072	0.0508558	0.37785	0.0516706	0.384661	0.052486	0.391506	0.0533021	0.398385	0.0541188	0.405297	0.0549361	0.412244	0.0557541	0.419225	0.0565727	0.401968	0.054661	0.401968	0.0545639	0.401968	0.0547582			0.374786	0.0517036	0.374348	0.0517241	0.377733	0.0521143	0.374968	0.0520261	0.379562	0.0513645	0.374413	0.0515496	0.377807	0.0521976	0.378743	0.051624	0.378594	0.0521706	0.380639	0.0517981	0.38098	0.0518454
				0.371157	0.0508735	0.377937	0.0516886	0.38475	0.0525043	0.391596	0.0533207	0.398477	0.0541377	0.405391	0.0549553	0.41234	0.0557735	0.419323	0.0565924	0.403941	0.0548947	0.403941	0.0547972	0.403941	0.0549923			0.374199	0.0515323	0.373764	0.0515557	0.377127	0.0519314	0.374364	0.0518481	0.380244	0.0513547	0.375039	0.0515338	0.377212	0.052022	0.379385	0.0516161	0.377952	0.051982	0.381254	0.0518072	0.381611	0.0518253
				0.371186	0.0508927	0.377967	0.0517081	0.38478	0.0525242	0.391627	0.0533409	0.398508	0.0541582	0.405423	0.0549761	0.412373	0.0557947	0.419356	0.0566139	0.405917	0.0551284	0.405917	0.0550305	0.405917	0.0552264			0.373909	0.051392	0.373475	0.0514189	0.376828	0.0517788	0.374066	0.0517019	0.381352	0.0514034	0.376055	0.0515721	0.376918	0.0518776	0.380428	0.0516636	0.377635	0.0518268	0.382256	0.0518701	0.382637	0.0518591
				ConcTikEll	ConcTikEll	ConcTikEll	ConcTikEll	ConcTikEll	ConcTikEll	ConcTikEll	ConcTikEll	ConcTikEll	ConcTikEll	ConcTikEll	ConcTikEll	ConcTikEll	ConcTikEll	ConcTikEll	ConcTikEll	0.407896	0.0553622	0.407896	0.0552638	0.407896	0.0554606			0.373921	0.0512856	0.373487	0.0513164	0.376841	0.0516592	0.374079	0.0515905	0.382855	0.0515092	0.377433	0.0516635	0.376931	0.0517671	0.381843	0.0517654	0.377649	0.051708	0.383615	0.0519851	0.384029	0.0519458
																				0.409877	0.055596	0.409877	0.0554972	0.409877	0.0556949			0.374236	0.0512151	0.373799	0.0512502	0.377166	0.0515752	0.374403	0.051516	0.384713	0.0516693	0.379136	0.0518057	0.37725	0.0516926	0.383592	0.0519186	0.377992	0.051628	0.385296	0.0521491	0.385748	0.052083
																				0.411862	0.0558299	0.411862	0.0557306	0.411862	0.0559292			0.374846	0.0511819	0.374407	0.0512215	0.377797	0.0515282	0.375031	0.0514798	0.386875	0.0518793	0.381118	0.0519946	0.377869	0.0516557	0.385627	0.052119	0.37866	0.0515883	0.387252	0.0523575	0.387749	0.0522672
																				0.413849	0.0560638	0.413849	0.0559641	0.413849	0.0561635			0.375741	0.0511866	0.375297	0.0512309	0.378721	0.0515193	0.375951	0.0514827	0.389281	0.0521334	0.383324	0.0522252	0.378777	0.0516571	0.387892	0.0523612	0.379638	0.0515897	0.38943	0.0526047	0.389976	0.0524931
																				0.415839	0.0562978	0.415839	0.0561977	0.415839	0.0563979			0.376903	0.0512291	0.376453	0.0512783	0.379921	0.0515486	0.377146	0.0515245	0.391867	0.0524248	0.385693	0.0524911	0.379955	0.0516966	0.390327	0.0526386	0.380908	0.0516322	0.391771	0.052884	0.392368	0.0527547
																				0.417831	0.0565318	0.417831	0.0564313	0.417831	0.0566324			0.378309	0.0513086	0.377852	0.0513627	0.381373	0.0516155	0.378592	0.0516046	0.394562	0.0527454	0.388163	0.0527851	0.381381	0.0517736	0.392863	0.0529436	0.382445	0.0517149	0.39421	0.0531877	0.394862	0.0530448
																				0.419827	0.0567659	0.419827	0.0566649	0.419827	0.0568669			0.379932	0.0514236	0.379467	0.0514825	0.383048	0.0517187	0.38026	0.0517213	0.397292	0.0530866	0.390664	0.0530991	0.383026	0.0518866	0.395433	0.0532679	0.384219	0.0518361	0.396682	0.0535076	0.397387	0.0533555
																				0.421825	0.057	0.421825	0.0568986	0.420961	0.057			0.38174	0.0515718	0.381266	0.0516353	0.384915	0.0518562	0.38212	0.0518723	0.399982	0.053439	0.39313	0.0534247	0.38486	0.0520333	0.397966	0.0536026	0.386195	0.0519937	0.399118	0.0538349	0.399876	0.0536784
																				0.421825	0.057	0.422693	0.057	ConcBand	ConcBand			0.383698	0.0517503	0.383214	0.0518182	0.386937	0.0520254	0.384133	0.0520548	0.402561	0.053793	0.395492	0.0537529	0.386845	0.0522109	0.400393	0.0539386	0.388336	0.0521845	0.401453	0.0541607	0.402261	0.0540046
																				IsoLine	IsoLine	ConcBand	ConcBand					0.385768	0.0519556	0.385274	0.0520276	0.389074	0.0522229	0.386262	0.0522651	0.404956	0.054139	0.397686	0.0540748	0.388944	0.0524159	0.402648	0.0542668	0.390599	0.0524047	0.403622	0.0544761	0.404476	0.0543252
																												0.38791	0.0521839	0.387405	0.0522594	0.391285	0.0524449	0.388464	0.0524992	0.407103	0.0544675	0.399653	0.0543815	0.391116	0.0526444	0.404669	0.0545782	0.39294	0.0526501	0.405567	0.0547725	0.406462	0.0546315
																												0.390082	0.0524305	0.389566	0.0525091	0.393527	0.0526871	0.390697	0.0527525	0.408943	0.0547696	0.401338	0.0546648	0.393318	0.0528919	0.406401	0.0548643	0.395314	0.052916	0.407234	0.0550418	0.408163	0.0549151
																												0.392242	0.0526908	0.391715	0.052772	0.395756	0.0529447	0.392918	0.05302	0.410426	0.055037	0.402696	0.0549169	0.395508	0.0531536	0.407797	0.0551172	0.397674	0.053197	0.408578	0.0552767	0.409535	0.0551683
																												0.394347	0.0529596	0.39381	0.0530427	0.397929	0.0532128	0.395082	0.0532967	0.411511	0.0552624	0.40369	0.0551309	0.397642	0.0534244	0.408819	0.0553302	0.399975	0.0534879	0.409562	0.0554707	0.410538	0.0553841
																												0.396357	0.0532317	0.39581	0.0533161	0.400004	0.0534861	0.397149	0.053577	0.41217	0.0554397	0.404293	0.055301	0.39968	0.053699	0.409439	0.0554973	0.402172	0.0537829	0.41016	0.0556187	0.411146	0.0555568
																												0.398232	0.0535018	0.397676	0.0535869	0.40194	0.0537594	0.399077	0.0538556	0.412383	0.0555641	0.404487	0.0554225	0.401582	0.053972	0.40964	0.0556141	0.404222	0.0540762	0.410355	0.0557165	0.411342	0.0556816
																												0.399937	0.0537647	0.399372	0.0538498	0.403699	0.0540272	0.40083	0.054127	Red	Red	Red	Red	0.40331	0.0542383	Red	Red	0.406085	0.0543622	Red	Red	Red	Red
																												0.401437	0.0540153	0.400865	0.0540996	0.405248	0.0542844	0.402372	0.0543859					0.404831	0.0544925			0.407725	0.0546353
																												0.402704	0.0542486	0.402126	0.0543315	0.406556	0.054526	0.403675	0.0546273					0.406116	0.0547297			0.40911	0.0548901
																												0.403714	0.0544602	0.403131	0.054541	0.407597	0.0547473	0.404713	0.0548465					0.407139	0.0549454			0.410213	0.0551218
																												0.404445	0.0546458	0.403859	0.054724	0.408352	0.0549439	0.405465	0.0550392					0.40788	0.0551352			0.411013	0.0553258
																												0.404885	0.054802	0.404297	0.054877	0.408805	0.0551121	0.405917	0.0552017					0.408326	0.0552956			0.411493	0.0554981
																												0.405024	0.0549256	0.404435	0.054997	0.408949	0.0552485	0.40606	0.0553308					0.408467	0.0554234			0.411645	0.0556355
																												Red	Red	Red	Red	Red	Red	Red	Red					Red	Red			Red	Red
[truncated: 14 more columns]

## Sheet: PlotDat3
Source sheet	data	250	0.00114143	493.75	0
Plot name		251.912	0.00123389	510	0
Plot Type	16	253.824	0.00133347	510	1
1st free col	7	255.735	0.00144066	493.75	1
Sigma Level	1	257.647	0.00155602	493.75	0
Absolute Errs	FALSE	259.559	0.00168012	ErrBox	ErrBox
Symbol Type	1	261.471	0.00181359	510	0
Inverse Plot	FALSE	263.382	0.00195707	526.25	0
Color Plot	TRUE	265.294	0.00211127	526.25	1
3D plot	FALSE	267.206	0.00227693	510	1
Linear	FALSE	269.118	0.00245482	510	0
Data Range	AB36:AC59	271.029	0.00264579	ErrBox	ErrBox
		272.941	0.00285071	526.25	0
		274.853	0.00307053	542.5	0
		276.765	0.00330623	542.5	8
		278.676	0.00355885	526.25	8
		280.588	0.00382951	526.25	0
		282.5	0.00411937	ErrBox	ErrBox
		284.412	0.00442967	542.5	0
		286.324	0.0047617	558.75	0
		288.235	0.00511684	558.75	4
		290.147	0.00549654	542.5	4
		292.059	0.0059023	542.5	0
		293.971	0.00633572	ErrBox	ErrBox
		295.882	0.00679848	558.75	0
		297.794	0.00729234	575	0
		299.706	0.00781913	575	8
		301.618	0.0083808	558.75	8
		303.529	0.00897936	558.75	0
		305.441	0.00962396	ErrBox	ErrBox
		307.353	0.0103044	575	0
		309.265	0.0110287	591.25	0
		311.176	0.0117993	591.25	2
		313.088	0.0126189	575	2
		315	0.0134902	575	0
		316.912	0.0144159	ErrBox	ErrBox
		318.824	0.015399
		320.735	0.0164427
		322.647	0.0175501
		324.559	0.0187246
		326.471	0.0199696
		328.382	0.021289
		330.294	0.0226936
		332.206	0.0242104
		334.118	0.0257929
		336.029	0.0274623
		337.941	0.0292294
		339.853	0.031113
		341.765	0.0331164
		343.676	0.035225
		345.588	0.0374656
		347.5	0.0398309
		349.412	0.0423428
		351.324	0.0450043
		353.235	0.0478105
		355.147	0.0507828
		357.059	0.0539319
		358.971	0.0572693
		360.882	0.0608076
		362.794	0.0645604
		364.706	0.0685425
		366.618	0.0727705
		368.529	0.077262
		370.441	0.0820365
		372.353	0.0871156
		374.265	0.0925224
		376.176	0.0982829
		378.088	0.104425
		380	0.110979
		381.912	0.11798
		383.824	0.125463
		385.735	0.13347
		387.647	0.142044
		389.559	0.151234
		391.471	0.161092
		393.382	0.171674
		395.294	0.183042
		397.206	0.195264
		399.118	0.208413
		401.029	0.222565
		402.941	0.237806
		404.853	0.254227
		406.765	0.271924
		408.676	0.291001
		410.588	0.31157
		412.5	0.333748
		414.412	0.357661
		416.324	0.383441
		418.235	0.411228
		420.147	0.441168
		422.059	0.473416
		423.971	0.508129
		425.882	0.545477
		427.794	0.585631
		429.706	0.628767
		431.618	0.67507
		433.529	0.724723
		435.441	0.777916
		437.353	0.83484
		439.265	0.895684
		441.176	0.960638
		443.088	1.02989
		445	1.10363
		446.912	1.18203
		448.824	1.26526
		450.735	1.35349
		452.647	1.44686
		454.559	1.54552
		456.471	1.64958
		458.382	1.75915
		460.294	1.87432
		462.206	1.99514
		464.118	2.12166
		466.029	2.25388
		467.941	2.39179
		469.853	2.53534
		471.765	2.68444
		473.676	2.83899
		475.588	2.99883
		477.5	3.16378
		479.412	3.3336
		481.324	3.50804
		483.235	3.68678
		485.147	3.86949
		487.059	4.05578
		488.971	4.24522
		490.882	4.43737
		492.794	4.63172
		494.706	4.82773
		496.618	5.02485
		498.529	5.22249
		500.441	5.42001
		502.353	5.61677
		504.265	5.8121
		506.176	6.00533
		508.088	6.19574
		510	6.38265
		511.912	6.56532
		513.824	6.74307
		515.735	6.91516
		517.647	7.08094
		519.559	7.23969
		521.471	7.39078
		523.382	7.53356
		525.294	7.66744
		527.206	7.79184
		529.118	7.90623
		531.029	8.01012
		532.941	8.10307
		534.853	8.18468
		536.765	8.25462
		538.677	8.31259
		540.588	8.35836
		542.5	8.39176
		544.412	8.41267
		546.324	8.42105
		548.235	8.4169
		550.147	8.40028
		552.059	8.37131
		553.971	8.33018
		555.882	8.27713
		557.794	8.21244
		559.706	8.13644
		561.618	8.04954
		563.529	7.95215
		565.441	7.84475
		567.353	7.72785
		569.265	7.60199
		571.177	7.46773
		573.088	7.32568
		575	7.17645
		576.912	7.02066
		578.824	6.85895
		580.735	6.69198
		582.647	6.52038
		584.559	6.34482
		586.471	6.16594
		588.382	5.98436
		590.294	5.80071
		592.206	5.6156
		594.118	5.42963
		596.029	5.24335
		597.941	5.05732
		599.853	4.87204
		601.765	4.688
		603.677	4.50568
		605.588	4.32551
		607.5	4.14788
		609.412	3.97317
		611.324	3.8017
		613.235	3.6338
		615.147	3.46972
		617.059	3.30971
		618.971	3.15398
		620.882	3.00272
		622.794	2.85605
		624.706	2.71411
		626.618	2.577
		628.529	2.44477
		630.441	2.31747
		632.353	2.19513
		634.265	2.07772
		636.177	1.96524
		638.088	1.85764
		640	1.75486
		641.912	1.65683
		643.824	1.56346
		645.735	1.47465
		647.647	1.39028
		649.559	1.31024
		651.471	1.2344
		653.382	1.16262
		655.294	1.09477
		657.206	1.03069
		659.118	0.970241
		661.029	0.913273
		662.941	0.859636
		664.853	0.809177
		666.765	0.761747
		668.677	0.717198
		670.588	0.675387
		672.5	0.636167
		674.412	0.599399
		676.324	0.564945
		678.235	0.532676
		680.147	0.502461
		682.059	0.47418
		683.971	0.447712
		685.882	0.422944
		687.794	0.399768
		689.706	0.37808
		691.618	0.357783
		693.529	0.338783
		695.441	0.320993
		697.353	0.304328
		699.265	0.288712
		701.177	0.274063
		703.088	0.260327
		705	0.247433
		706.912	0.235319
		708.824	0.223929
		710.735	0.213212
		712.647	0.203118
		714.559	0.193603
		716.471	0.184625
		718.382	0.176139
		720.294	0.168123
		722.206	0.160537
		724.118	0.153345
		726.029	0.146531
		727.941	0.140063
		729.853	0.133917
		731.765	0.128071
		733.677	0.122501
		735.588	0.117194
		737.5	0.112135
		739.412	0.107301
		741.324	0.102698
		743.235	0.0982972
		745.147	0.0940827
		747.059	0.0900555
		748.971	0.0861989
		750.882	0.082504
		752.794	0.0789623
		754.706	0.0755662
		756.618	0.0723032
		758.529	0.0691789
		760.441	0.0661748
		762.353	0.0632971
		764.265	0.0605284
		766.176	0.0578762
		768.088	0.0553291
		770	0.0528828
		771.912	0.0505334
		773.824	0.0482771
		775.735	0.0460985
		777.647	0.044009
		779.559	0.042015
		781.471	0.0401004
		783.382	0.0382557
		785.294	0.0364867
		787.206	0.0347895
		789.118	0.0331675
		791.029	0.0316115
		792.941	0.0301191
		794.853	0.0286881
		796.765	0.0273165
		798.676	0.0259964
		800.588	0.0247382
		802.5	0.0235333
		804.412	0.0223796
		806.324	0.0212755
		808.235	0.0202192
		810.147	0.0192089
		812.059	0.018243
		813.971	0.0173198
		815.882	0.0164378
		817.794	0.0155955
		819.706	0.0147913
		821.618	0.0140238
		823.529	0.0132917
		825.441	0.0125876
		827.353	0.0119229
		829.265	0.0112894
		831.176	0.0106858
		833.088	0.010111
		835	0.00956374
		836.912	0.00904297
		838.824	0.0085476
		840.735	0.00807655
		842.647	0.00762292
		844.559	0.0071982
		846.471	0.00679475
		848.382	0.00641164
		850.294	0.00604801
		852.206	0.005703
		854.118	0.00537576
		856.029	0.00506553
		857.941	0.00477153
		859.853	0.00449299
		861.765	0.00422923
		863.676	0.00397955
		865.588	0.00374328
		867.5	0.00351981
		869.412	0.00330851
		871.324	0.00310879
		873.235	0.0029201
		875.147	0.00274189
		877.059	0.00257365
		878.971	0.00241487
		880.882	0.00226509
		882.794	0.00212384
		884.706	0.0019907
		886.618	0.00186524
		888.529	0.00174707
		890.441	0.0016358
		892.353	0.00153107
		894.265	0.00143253
		896.176	0.00133987
		898.088	0.00125274
		IsoLine	IsoLine

## Sheet: PlotDat21
Source sheet	data	0.69156	0.0852533	0.62	0.0789492	0.604365	0.0773022	0.720151	0.0882645	0.730198	0.0882551	0.726223	0.0894555	0.72131	0.0897195	0.73265	0.0898892	0.734131	0.0902217	0.722596	0.0900546	0.732415	0.090724	0.748694	0.0917479	0.748766	0.091524	0.745834	0.0919808	0.756903	0.0930019	0.765813	0.0940539	0.769172	0.0940172	0.763688	0.0943059	0.796497	0.0971146	0.76166	0.0947422	0.773891	0.0951794	0.773353	0.0952834	0.780327	0.09652	0.819812	0.0971036
Plot name	Concordia7	0.701799	0.0854033	0.62	0.0789492	0.620244	0.0789747	0.719499	0.0884555	0.729789	0.088431	0.725598	0.0895491	0.720685	0.089814	0.732027	0.0900237	0.733489	0.0903378	0.721953	0.0902546	0.731334	0.0907356	0.748016	0.0918977	0.748294	0.0917977	0.745392	0.0921999	0.756454	0.0931898	0.765173	0.09414	0.768727	0.0942298	0.76307	0.0943648	0.795747	0.0973386	0.760992	0.094916	0.773258	0.0952602	0.772697	0.0954225	0.779692	0.0965812	0.819296	0.0973447
Plot Type	1	0.698503	0.0862294	0.627736	0.0797591	0.636279	0.0806498	0.717626	0.0885066	0.728617	0.0885243	0.723789	0.0894976	0.718877	0.089762	0.730231	0.090018	0.731635	0.0903069	0.720109	0.0903158	0.728214	0.0904889	0.746059	0.0918953	0.746944	0.0919896	0.744129	0.0923324	0.755169	0.0932846	0.763317	0.0940771	0.767453	0.0943548	0.761276	0.0942776	0.793584	0.0973967	0.759072	0.094941	0.771425	0.0951933	0.770806	0.0954132	0.777846	0.0964918	0.817819	0.0974874
1st free col	53	0.693602	0.0864632	0.635509	0.0805696	0.652474	0.0823274	0.714614	0.0884155	0.726713	0.0885324	0.720875	0.0893033	0.715964	0.0895659	0.72734	0.0898725	0.72865	0.0901305	0.717144	0.0902355	0.723307	0.090004	0.742911	0.0917409	0.744753	0.0920942	0.742079	0.0923748	0.753082	0.0932836	0.760327	0.093868	0.765386	0.0943887	0.758383	0.0940481	0.790067	0.0972874	0.755984	0.0948162	0.768471	0.0949817	0.767762	0.0952558	0.774872	0.096256	0.815419	0.0975278
Sigma Level	1	0.705182	0.0868179	0.643318	0.0813807	0.668829	0.0840077	0.710594	0.0881862	0.724129	0.0884552	0.716983	0.0889747	0.712073	0.0892341	0.723481	0.0895935	0.724664	0.0898162	0.713188	0.0900174	0.717011	0.0893201	0.738707	0.0914413	0.74178	0.0921088	0.739297	0.0923259	0.75025	0.0931869	0.756333	0.0935217	0.762582	0.0943308	0.754518	0.0936863	0.785292	0.0970137	0.751862	0.0945469	0.764524	0.0946346	0.763699	0.0949574	0.770897	0.0958838	0.812163	0.0974647
Absolute Errs	FALSE	0.705749	0.0869766	0.651165	0.0821924	0.685345	0.0856906	0.705743	0.0878287	0.720937	0.0882947	0.712283	0.088526	0.707375	0.0887812	0.718822	0.0891932	0.719851	0.0893779	0.708413	0.0896709	0.709835	0.0884927	0.733633	0.0910094	0.738106	0.092033	0.735861	0.0921871	0.746751	0.0929972	0.75151	0.0930535	0.759117	0.0941825	0.74985	0.0932081	0.77939	0.096583	0.746887	0.094145	0.759759	0.0941672	0.758793	0.0945308	0.766097	0.0953917	0.808139	0.0973
Symbol Type	1	0.694464	0.0870802	0.65905	0.0830047	0.702025	0.0873761	0.700272	0.0873587	0.717222	0.0880554	0.706981	0.087977	0.702075	0.0882271	0.713567	0.088689	0.714422	0.0888346	0.703029	0.0892112	0.702362	0.0875887	0.727909	0.0904642	0.733831	0.0918689	0.731863	0.0919621	0.742679	0.0927196	0.746068	0.0924838	0.755085	0.0939479	0.744583	0.0926344	0.772521	0.0960071	0.741276	0.093628	0.754382	0.0936	0.75326	0.0939948	0.76068	0.0948011	0.803457	0.0970381
Inverse Plot	FALSE	0.706158	0.087548	0.666972	0.0838177	0.718871	0.0890642	0.694419	0.0867966	0.713087	0.0877437	0.701309	0.0873516	0.696405	0.0875958	0.707945	0.0881031	0.708613	0.0882101	0.69727	0.0886583	0.695196	0.0866814	0.721786	0.0898296	0.729073	0.0916209	0.727412	0.091657	0.738147	0.0923616	0.740246	0.0918375	0.750598	0.0936335	0.738946	0.0919902	0.764873	0.0953016	0.735275	0.0930186	0.748629	0.0929576	0.747341	0.0933727	0.754885	0.0941378	0.798244	0.0966862
Color Plot	TRUE	0.718778	0.0884166	0.674932	0.0846312	0.735883	0.0907549	0.688442	0.0861671	0.708643	0.0873682	0.695514	0.0866772	0.690613	0.0869151	0.702203	0.087461	0.70268	0.0875317	0.691389	0.0880365	0.688919	0.0858443	0.715532	0.0891331	0.723961	0.0912957	0.722631	0.0912803	0.733277	0.0919331	0.734298	0.0911428	0.745776	0.0932477	0.733188	0.0913036	0.756654	0.0944859	0.729145	0.0923432	0.742752	0.0922682	0.741295	0.0926919	0.748963	0.0934308	0.792644	0.0962538
3D plot	FALSE	0.716093	0.0887939	0.68293	0.0854454	0.753063	0.0924482	0.682602	0.0854977	0.704013	0.0869391	0.68985	0.0859832	0.684951	0.0862146	0.696591	0.0867908	0.696881	0.086829	0.685642	0.0873729	0.684038	0.0851452	0.70942	0.0884054	0.718634	0.0909023	0.717649	0.0908421	0.728202	0.0914458	0.728484	0.0904301	0.740752	0.0928011	0.727558	0.0906048	0.748089	0.0935822	0.723155	0.0916316	0.737006	0.091562	0.735386	0.0919819	0.743174	0.0927111	0.786808	0.0957527
Linear	FALSE	0.715277	0.0890283	0.690967	0.0862602	0.770413	0.0941442	0.677152	0.0848176	0.699323	0.0864681	0.684564	0.0853	0.679667	0.0855249	0.691355	0.0861218	0.691469	0.0861328	0.680281	0.0866964	0.680949	0.0846408	0.703716	0.0876782	0.713238	0.0904514	0.712602	0.0903545	0.723061	0.0909128	0.723058	0.0897305	0.735662	0.0923059	0.722304	0.0899241	0.739411	0.0926151	0.717566	0.0909147	0.731644	0.0908697	0.729872	0.0912739	0.737771	0.09201	0.780896	0.0951967
Data Range	E38:I59	0.725777	0.089775	0.699041	0.0870755	0.787935	0.0958428	0.672333	0.0841565	0.6947	0.0859681	0.679887	0.0846573	0.674992	0.0848763	0.686722	0.0854832	0.686681	0.0854734	0.675539	0.0860368	0.679902	0.0843719	0.698671	0.0869832	0.707919	0.0899553	0.707629	0.0898307	0.717995	0.0903488	0.718257	0.0890747	0.730647	0.0917756	0.717654	0.0892915	0.730857	0.0916111	0.712623	0.0902239	0.7269	0.0902216	0.724995	0.0905988	0.73299	0.0913583	0.775069	0.0946009
		0.737361	0.0907308	0.707155	0.0878915	0.805631	0.097544	0.668353	0.0835433	0.690271	0.0854526	0.676023	0.0840834	0.671131	0.084297	0.682897	0.0849029	0.682727	0.0848798	0.671625	0.0854227	0.680983	0.0843604	0.694505	0.0863509	0.702824	0.0894275	0.702864	0.089285	0.713141	0.0897692	0.714291	0.0884912	0.725841	0.0912246	0.713812	0.0887345	0.722661	0.0905974	0.708541	0.0895894	0.72298	0.0896461	0.720967	0.0899861	0.729039	0.0907843	0.769486	0.0939815
		0.738356	0.0910189	0.715307	0.0887081	0.823501	0.0992479	0.665389	0.0830049	0.686156	0.0849358	0.673143	0.0836033	0.668252	0.0838124	0.680045	0.0844064	0.679779	0.0843778	0.668709	0.0848811	0.684103	0.084607	0.691399	0.0858088	0.698091	0.0888825	0.698437	0.0887323	0.708631	0.0891897	0.711333	0.0880056	0.721377	0.0906681	0.710946	0.0882774	0.715045	0.0896018	0.7055	0.089039	0.720057	0.0891683	0.717964	0.0894626	0.726093	0.0903132	0.764299	0.0933554
		0.736142	0.0910219	0.723497	0.0895254	0.841549	0.100954	0.663567	0.0825648	0.682468	0.0844318	0.67137	0.083238	0.66648	0.0834437	0.678292	0.0840152	0.677966	0.0839894	0.666918	0.0844356	0.68901	0.0850919	0.68949	0.0853808	0.693848	0.088335	0.69447	0.0881876	0.704589	0.0886262	0.709512	0.0876392	0.717376	0.0901211	0.709182	0.0879403	0.708218	0.0886514	0.703632	0.0885966	0.718258	0.0888092	0.716118	0.0890511	0.724278	0.0899656	0.75965	0.0927397
		0.743955	0.0912592	0.731727	0.0903432	0.859775	0.102664	0.66297	0.0822421	0.679307	0.0839542	0.670784	0.0830034	0.665894	0.0832069	0.677715	0.0837465	0.677367	0.0837315	0.666331	0.0841057	0.695306	0.0857758	0.688861	0.0850854	0.690213	0.0878	0.691071	0.087666	0.701125	0.088094	0.708909	0.0874078	0.713947	0.0895986	0.708595	0.0877379	0.702365	0.0877721	0.703018	0.0882816	0.717661	0.0885843	0.71551	0.0887697	0.723675	0.0897567	0.755666	0.0921513
		0.732339	0.0915119	0.739997	0.0911617	IsoLine	IsoLine	0.663621	0.0820511	0.67676	0.0835162	0.671408	0.0829098	0.666519	0.0831124	0.678337	0.083612	0.678009	0.0836155	0.666974	0.0839058	0.702481	0.0866032	0.68954	0.0849356	0.687283	0.0872921	0.688332	0.0871814	0.698334	0.0876077	0.70955	0.0873217	0.711184	0.0891148	0.709213	0.087679	0.697647	0.086988	0.703685	0.0881078	0.718294	0.0885035	0.716166	0.0886306	0.72431	0.0896956	0.752455	0.0916061
		0.745776	0.0918818	0.748305	0.0919807			0.665494	0.082	0.674895	0.0831297	0.673217	0.0829613	0.668328	0.0831644	0.680133	0.0836177	0.679863	0.0836463	0.668818	0.0838446	0.709955	0.0875072	0.691496	0.0849379	0.68514	0.0868252	0.686327	0.0867473	0.696291	0.0871805	0.711405	0.0873846	0.709162	0.088683	0.711007	0.0877662	0.694193	0.0863203	0.705605	0.0880828	0.720127	0.0885704	0.718057	0.0886399	0.726156	0.0897849	0.750105	0.091119
		0.744431	0.0920266	0.756654	0.0928004			0.668506	0.0820911	0.673765	0.0828052	0.676131	0.0831556	0.671241	0.0833606	0.683024	0.0837632	0.682848	0.0838227	0.671783	0.0839248	0.71712	0.0884145	0.694645	0.0850923	0.68384	0.086412	0.685113	0.0863753	0.695052	0.0868241	0.714396	0.0875937	0.707937	0.0883149	0.7139	0.0879957	0.692095	0.0857874	0.708694	0.0882077	0.723082	0.088782	0.721101	0.0887973	0.729131	0.0900208	0.74868	0.0907033
		0.752001	0.0931384	0.765042	0.0936207			0.672526	0.0823204	0.673399	0.0825515	0.680023	0.0834842	0.675131	0.0836923	0.686883	0.0840422	0.686834	0.084137	0.67574	0.0841429	0.723398	0.0892516	0.698848	0.085392	0.683421	0.0860638	0.684721	0.0860757	0.694652	0.0865481	0.718389	0.0879399	0.707541	0.0880205	0.717765	0.0883575	0.691413	0.0854037	0.712815	0.0884769	0.727028	0.089129	0.725164	0.0890958	0.733105	0.0903929	0.748218	0.0903704
		0.784015	0.093737	0.773471	0.0944416			0.677378	0.0826779	0.673808	0.0823757	0.684723	0.0839329	0.679829	0.0841452	0.691542	0.0844425	0.691647	0.0845753	0.680514	0.0844894	0.728279	0.0899507	0.703923	0.0858238	0.683892	0.08579	0.685163	0.0858567	0.6951	0.0863602	0.723212	0.0884081	0.707986	0.087808	0.722433	0.0888357	0.692163	0.0851798	0.71779	0.0888788	0.731793	0.0895964	0.730069	0.0895223	0.737905	0.090885	0.748734	0.0901293
		0.753134	0.0943099	0.781939	0.0952631			0.682849	0.0831479	0.67498	0.0822824	0.690025	0.0844819	0.685129	0.0846993	0.696797	0.0849467	0.697076	0.0851186	0.685898	0.0849491	0.731368	0.0904551	0.709647	0.086369	0.685242	0.0855982	0.686426	0.0857242	0.696386	0.0862654	0.728654	0.0889779	0.70926	0.087683	0.727701	0.0894094	0.694326	0.0851217	0.723401	0.0893958	0.73717	0.0901637	0.735603	0.0900583	0.743322	0.0914756	0.750211	0.0899867
		IsoLine	IsoLine	0.790448	0.0960853			0.688701	0.08371	0.676884	0.0822743	0.695697	0.0851073	0.690799	0.0853306	0.702419	0.0855326	0.702884	0.0857431	0.691657	0.085502	0.732415	0.090724	0.715769	0.0870037	0.687434	0.0854935	0.688476	0.0856818	0.698473	0.0862664	0.734476	0.0896242	0.711327	0.087649	0.733337	0.0900536	0.697843	0.085231	0.729403	0.0900053	0.742923	0.0908061	0.741522	0.0906804	0.749117	0.0921389	0.752611	0.0899463
				0.798998	0.096908			0.694678	0.0843395	0.679468	0.0823515	0.701492	0.0857817	0.696592	0.0860114	0.708161	0.0861747	0.708818	0.0864216	0.697538	0.0861238	Red	Red	0.722024	0.0877001	0.690407	0.0854789	0.691258	0.0857307	0.701305	0.0863631	0.740424	0.0903189	0.714131	0.087707	0.739095	0.0907402	0.702618	0.0855047	0.735532	0.0906806	0.748801	0.0914954	0.747568	0.0913613	0.755039	0.0928459	0.755867	0.0900093
				0.807589	0.0977314			0.700519	0.0850089	0.682661	0.082512	0.707156	0.0864757	0.702254	0.0867119	0.713773	0.0868449	0.714617	0.0871242	0.703285	0.0867874			0.728136	0.0884279	0.694081	0.0855547	0.694694	0.0858695	0.704804	0.0865528	0.746238	0.0910316	0.717596	0.0878552	0.744725	0.091439	0.70852	0.0859354	0.741522	0.0913923	0.754546	0.0922017	0.753477	0.0920712	0.760828	0.0935656	0.759891	0.090174
				0.81622	0.0985554			0.705968	0.0856891	0.686375	0.0827513	0.712442	0.0871589	0.707537	0.0874015	0.71901	0.0875139	0.720029	0.0878204	0.708647	0.0874639			0.733839	0.0891551	0.698355	0.0857189	0.698692	0.0860945	0.708876	0.0868304	0.751664	0.0917312	0.721628	0.0880898	0.74998	0.0921196	0.715389	0.0865113	0.747111	0.0921091	0.759908	0.092894	0.758991	0.0927792	0.766231	0.0942667	0.764574	0.0904359
				0.824893	0.09938			0.710788	0.0863502	0.690511	0.083063	0.717119	0.0878015	0.712212	0.0880501	0.723642	0.0881525	0.724817	0.0884798	0.713388	0.0881235			0.738885	0.0898501	0.703113	0.0859669	0.703143	0.0863996	0.713408	0.0871884	0.756465	0.092387	0.726115	0.0884043	0.754629	0.0927523	0.723037	0.0872167	0.752054	0.0927999	0.764652	0.093542	0.763868	0.0934543	0.771012	0.0949184	0.769786	0.0907879
				0.833607	0.100205			0.714767	0.0869633	0.694954	0.0834385	0.720983	0.0883754	0.716074	0.0886294	0.727467	0.0887328	0.728771	0.0890734	0.717303	0.0887376			0.743051	0.0904824	0.708226	0.086292	0.707924	0.0867763	0.718278	0.0876169	0.760432	0.0929705	0.730937	0.0887901	0.758471	0.0933093	0.731256	0.0880324	0.756136	0.0934344	0.768572	0.0941175	0.767896	0.094067	0.774963	0.0954924	0.775387	0.0912203
				0.842363	0.101031			0.717732	0.0875017	0.699584	0.0838676	0.723863	0.0888556	0.718953	0.089114	0.730319	0.0892294	0.731719	0.0895754	0.720219	0.0892792			0.746156	0.0910244	0.713552	0.0866854	0.712906	0.0872144	0.723353	0.0881043	0.763389	0.093456	0.735961	0.0892367	0.761337	0.0937663	0.739821	0.0889362	0.759177	0.0939849	0.771495	0.0945953	0.770899	0.0945905	0.777909	0.0959635	0.781222	0.0917213
				0.85116	0.101858			0.719553	0.0879419	0.704274	0.0843386	0.725636	0.0892209	0.720724	0.0894827	0.732072	0.0896205	0.733532	0.0899639	0.722009	0.0897247			0.748065	0.0914525	0.718949	0.0871363	0.717953	0.0877021	0.728493	0.0886372	0.76521	0.0938225	0.74105	0.0897319	0.763101	0.0941034	0.748499	0.0899032	0.761046	0.0944273	0.773294	0.0949545	0.772744	0.095002	0.779724	0.0963111	0.787135	0.0922773
				0.86	0.102685			0.720151	0.0882645	0.708897	0.0848386	0.726223	0.0894555	0.72131	0.0897195	0.73265	0.0898892	0.734131	0.0902217	0.722596	0.0900546			0.748694	0.0917479	0.724267	0.0876324	0.722926	0.0882259	0.73356	0.0892012	0.765813	0.0940539	0.746066	0.0902622	0.763688	0.0943059	0.757053	0.0909073	0.76166	0.0947422	0.773891	0.0951794	0.773353	0.0952834	0.780327	0.09652	0.792962	0.0928732
				0.86	0.102685			Red	Red	0.713327	0.0853541	Red	Red	Red	Red	Red	Red	Red	Red	Red	Red			Red	Red	0.729362	0.0881602	0.727691	0.0887716	0.738414	0.0897808	Red	Red	0.750872	0.0908131	Red	Red	0.765249	0.091921	Red	Red	Red	Red	Red	Red	Red	Red	0.798545	0.0934926
				IsoLine	IsoLine					0.717441	0.0858709															0.734096	0.0887053	0.732118	0.0893243	0.742924	0.0903603			0.755336	0.0913697			0.772865	0.0929166									0.803731	0.0941187
										0.72113	0.0863749															0.738338	0.0892528	0.736085	0.0898689	0.746966	0.0909238			0.759337	0.0919167			0.779692	0.093867									0.80838	0.0947343
										0.72429	0.0868524															0.741973	0.0897878	0.739484	0.0903906	0.75043	0.091456			0.762766	0.0924392			0.785545	0.0947462									0.812364	0.0953228
										0.726838	0.0872904															0.744903	0.0902956	0.742223	0.0908752	0.753221	0.0919423			0.765529	0.092923			0.790263	0.0955304									0.815575	0.095868
										0.728702	0.087677															0.747047	0.0907625	0.744228	0.0913093	0.755264	0.0923695			0.767551	0.0933548			0.793717	0.096198									0.817925	0.0963551
										0.729833	0.0880015															0.748346	0.0911757	0.745442	0.0916813	0.756502	0.0927259			0.768776	0.0937229			0.795815	0.096731									0.81935	0.0967707
										0.730198	0.0882551															0.748766	0.091524	0.745834	0.0919808	0.756903	0.0930019			0.769172	0.0940172			0.796497	0.0971146									0.819812	0.0971036
										Red	Red															Red	Red	Red	Red	Red	Red			Red	Red			Red	Red									Red	Red
[truncated: 2 more columns]

## Sheet: PlotDat26
Source sheet	data	0.718778	0.0884166	0.68681	0.0856906	0.72042	0.0890642	0.754701	0.0924482	0.789665	0.0958428	0.66	0.0831024	0.66	0.0829528	0.66	0.083252	0.652474	0.0823274	0.748694	0.0917479	0.748766	0.091524	0.745834	0.0919808	0.756903	0.0930019	0.765813	0.0940539	0.769172	0.0940172	0.763688	0.0943059	0.796497	0.0971146	0.76166	0.0947422	0.773891	0.0951794	0.773353	0.0952834	0.780327	0.09652	0.742284	0.0916392
Plot name	Concordia12	0.716093	0.0887939	0.68675	0.0857235	0.720358	0.0890984	0.754635	0.0924839	0.789594	0.0958798	0.66	0.0831024	0.66	0.0829528	0.66	0.083252	0.685345	0.0856906	0.748267	0.0918787	0.748426	0.0917604	0.745392	0.0921999	0.756454	0.0931898	0.765173	0.09414	0.768727	0.0942298	0.76307	0.0943648	0.795957	0.0973145	0.761238	0.0948916	0.773258	0.0952602	0.77294	0.0954055	0.779692	0.0965812	0.741929	0.091678
Plot Type	1	0.715277	0.0890283	0.686577	0.0857538	0.720174	0.0891299	0.754441	0.0925166	0.78939	0.0959138	0.664959	0.0836114	0.664959	0.0834609	0.664959	0.083762	0.718871	0.0890642	0.747035	0.091915	0.747457	0.091939	0.744129	0.0923324	0.755169	0.0932846	0.763317	0.0940771	0.767453	0.0943548	0.761276	0.0942776	0.794405	0.0973966	0.760029	0.0949489	0.771425	0.0951933	0.771749	0.0954353	0.777846	0.0964918	0.740912	0.0916349
1st free col	47	0.725777	0.089775	0.686304	0.0857789	0.719886	0.0891561	0.754136	0.0925438	0.789068	0.0959421	0.669933	0.0841207	0.669933	0.0839692	0.669933	0.0842722	0.753063	0.0924482	0.745032	0.0918559	0.745877	0.0920565	0.742079	0.0923748	0.753082	0.0932836	0.760327	0.093868	0.765386	0.0943887	0.758383	0.0940481	0.791871	0.0973592	0.758064	0.0949123	0.768471	0.0949817	0.769813	0.0953722	0.774872	0.096256	0.739315	0.0915131
Sigma Level	1	0.737361	0.0907308	0.685954	0.0857969	0.719514	0.0891748	0.753743	0.0925633	0.788654	0.0959623	0.674923	0.0846302	0.674923	0.0844777	0.674923	0.0847827	0.787935	0.0958428	0.742313	0.091703	0.743717	0.0921104	0.739297	0.0923259	0.75025	0.0931869	0.756333	0.0935217	0.762582	0.0943308	0.754518	0.0936863	0.788404	0.097203	0.755397	0.0947831	0.764524	0.0946346	0.767184	0.0952178	0.770897	0.0958838	0.737267	0.0913227
Absolute Errs	FALSE	0.738356	0.0910189	0.685554	0.0858063	0.719091	0.0891846	0.753296	0.0925734	0.788181	0.0959728	0.679926	0.08514	0.679926	0.0849865	0.679926	0.0852934	IsoLine	IsoLine	0.738952	0.0914605	0.74102	0.0920998	0.735861	0.0921871	0.746751	0.0929972	0.75151	0.0930535	0.759117	0.0941825	0.74985	0.0932081	0.784073	0.0969312	0.752102	0.0945645	0.759759	0.0941672	0.763936	0.0949764	0.766097	0.0953917	0.734935	0.0910791
Symbol Type	1	0.736142	0.0910219	0.685137	0.0858063	0.71865	0.0891846	0.75283	0.0925734	0.787689	0.0959728	0.684945	0.08565	0.684945	0.0854956	0.684945	0.0858044			0.735041	0.0911349	0.737838	0.0920248	0.731863	0.0919621	0.742679	0.0927196	0.746068	0.0924838	0.755085	0.0939479	0.744583	0.0926344	0.77896	0.096549	0.748267	0.0942628	0.754382	0.0936	0.760155	0.0946545	0.76068	0.0948011	0.732506	0.0908019
Inverse Plot	FALSE	0.743955	0.0912592	0.684737	0.0857969	0.718227	0.0891748	0.752382	0.0925633	0.787217	0.0959623	0.689979	0.0861602	0.689979	0.0860048	0.689979	0.0863155			0.730686	0.0907352	0.734233	0.091887	0.727412	0.091657	0.738147	0.0923616	0.740246	0.0918375	0.750598	0.0936335	0.738946	0.0919902	0.773166	0.0960638	0.743998	0.0938859	0.748629	0.0929576	0.755945	0.0942609	0.754885	0.0941378	0.730179	0.0905137
Color Plot	TRUE	0.732339	0.0915119	0.684386	0.0857789	0.717856	0.0891561	0.75199	0.0925438	0.786803	0.0959421	0.695028	0.0866707	0.695028	0.0865144	0.695028	0.086827			0.726006	0.0902722	0.730274	0.0916889	0.722631	0.0912803	0.733277	0.0919331	0.734298	0.0911428	0.745776	0.0932477	0.733188	0.0913036	0.766803	0.095485	0.739411	0.0934444	0.742752	0.0922682	0.751421	0.0938064	0.748963	0.0934308	0.728141	0.0902377
3D plot	FALSE	0.745776	0.0918818	0.684114	0.0857538	0.717567	0.0891299	0.751685	0.0925166	0.786481	0.0959138	0.700092	0.0871814	0.700092	0.0870241	0.700092	0.0873386			0.72113	0.0897586	0.726039	0.0914345	0.717649	0.0908421	0.728202	0.0914458	0.728484	0.0904301	0.740752	0.0928011	0.727558	0.0906048	0.759996	0.0948241	0.734631	0.0929501	0.737006	0.091562	0.746706	0.0933033	0.743174	0.0927111	0.726557	0.0899964
Linear	FALSE	0.744431	0.0920266	0.68394	0.0857235	0.717384	0.0890984	0.751491	0.0924839	0.786276	0.0958798	0.705171	0.0876923	0.705171	0.0875341	0.705171	0.0878505			0.716189	0.0892085	0.721611	0.0911287	0.712602	0.0903545	0.723061	0.0909128	0.723058	0.0897305	0.735662	0.0923059	0.722304	0.0899241	0.752876	0.0940937	0.729788	0.0924166	0.731644	0.0908697	0.74193	0.0927654	0.737771	0.09201	0.725557	0.0898093
Data Range	E46:I57	0.752001	0.0931384	0.683881	0.0856906	0.717321	0.0890642	0.751425	0.0924482	0.786206	0.0958428	0.710265	0.0882035	0.710265	0.0880443	0.710265	0.0883627			0.711318	0.0886367	0.717076	0.0907775	0.707629	0.0898307	0.717995	0.0903488	0.718257	0.0890747	0.730647	0.0917756	0.717654	0.0892915	0.745583	0.0933082	0.725015	0.0918584	0.7269	0.0902216	0.737221	0.0922074	0.73299	0.0913583	0.72522	0.0896916
		IsoLine	IsoLine	0.68394	0.0856576	0.717384	0.0890299	0.751491	0.0924126	0.786276	0.0958058	0.715375	0.0887149	0.715375	0.0885548	0.715375	0.0888751			0.706651	0.0880589	0.712521	0.0903876	0.702864	0.089285	0.713141	0.0897692	0.714291	0.0884912	0.725841	0.0912246	0.713812	0.0887345	0.738258	0.0924828	0.720442	0.0912907	0.72298	0.0896461	0.73271	0.0916444	0.729039	0.0907843	0.725574	0.0896527
				0.684114	0.0856274	0.717567	0.0889984	0.751685	0.0923798	0.786481	0.0957718	0.720499	0.0892266	0.720499	0.0890655	0.720499	0.0893877			0.702315	0.0874909	0.708036	0.0899667	0.698437	0.0887323	0.708631	0.0891897	0.711333	0.0880056	0.721377	0.0906681	0.710946	0.0882774	0.731044	0.0916336	0.716193	0.0907291	0.720057	0.0891683	0.728518	0.0910918	0.726093	0.0903132	0.726592	0.0896959
				0.684386	0.0856022	0.717856	0.0889722	0.75199	0.0923526	0.786803	0.0957435	0.725639	0.0897385	0.725639	0.0895765	0.725639	0.0899006			0.698428	0.0869481	0.703707	0.089523	0.69447	0.0881876	0.704589	0.0886262	0.709512	0.0876392	0.717376	0.0901211	0.709182	0.0879403	0.724082	0.0907771	0.712385	0.0901889	0.718258	0.0888092	0.72476	0.0905648	0.724278	0.0899656	0.728189	0.0898176
				0.684737	0.0855842	0.718227	0.0889535	0.752382	0.0923332	0.787217	0.0957233	0.730795	0.0902507	0.730795	0.0900877	0.730795	0.0904137			0.695096	0.0864454	0.69962	0.0890651	0.691071	0.087666	0.701125	0.088094	0.708909	0.0874078	0.713947	0.0895986	0.708595	0.0877379	0.717506	0.08993	0.709121	0.0896847	0.717661	0.0885843	0.721538	0.0900776	0.723675	0.0897567	0.730236	0.090008
				0.685137	0.0855749	0.71865	0.0889437	0.75283	0.092323	0.787689	0.0957128	0.735966	0.0907631	0.735966	0.0905991	0.735966	0.0909271			0.69241	0.0859964	0.695854	0.088602	0.688332	0.0871814	0.698334	0.0876077	0.70955	0.0873217	0.711184	0.0891148	0.709213	0.087679	0.711444	0.0891087	0.70649	0.0892304	0.718294	0.0885035	0.718942	0.0896435	0.72431	0.0896956	0.732569	0.0902517
				0.685554	0.0855749	0.719091	0.0889437	0.753296	0.092323	0.788181	0.0957128	0.741152	0.0912757	0.741152	0.0911108	0.741152	0.0914407			0.690444	0.0856135	0.692481	0.0881425	0.686327	0.0867473	0.696291	0.0871805	0.711405	0.0873846	0.709162	0.088683	0.711007	0.0877662	0.706016	0.0883293	0.704564	0.0888383	0.720127	0.0885704	0.71704	0.0892745	0.726156	0.0897849	0.734998	0.0905288
				0.685954	0.0855842	0.719514	0.0889535	0.753743	0.0923332	0.788654	0.0957233	0.746354	0.0917886	0.746354	0.0916227	0.746354	0.0919545			0.68925	0.085307	0.689568	0.0876958	0.685113	0.0863753	0.695052	0.0868241	0.714396	0.0875937	0.707937	0.0883149	0.7139	0.0879957	0.701326	0.087607	0.703396	0.0885191	0.723082	0.088782	0.715886	0.0889806	0.729131	0.0900208	0.737325	0.0908171
				0.686304	0.0856022	0.719886	0.0889722	0.754136	0.0923526	0.789068	0.0957435	0.751571	0.0923017	0.751571	0.0921348	0.751571	0.0924686			0.688861	0.0850854	0.687171	0.0872704	0.684721	0.0860757	0.694652	0.0865481	0.718389	0.0879399	0.707541	0.0880205	0.717765	0.0883575	0.697466	0.0869557	0.703018	0.0882816	0.727028	0.089129	0.71551	0.0887697	0.733105	0.0903929	0.739363	0.091093
				0.686577	0.0856274	0.720174	0.0889984	0.754441	0.0923798	0.78939	0.0957718	0.756804	0.0928151	0.756804	0.0926472	0.756804	0.0929829			0.689289	0.0849546	0.685337	0.0868747	0.685163	0.0858567	0.6951	0.0863602	0.723212	0.0884081	0.707986	0.087808	0.722433	0.0888357	0.694511	0.0863882	0.703439	0.0881322	0.731793	0.0895964	0.715923	0.0886477	0.737905	0.090885	0.740947	0.0913343
				0.68675	0.0856576	0.720358	0.0890299	0.754635	0.0924126	0.789594	0.0958058	0.762052	0.0933287	0.762052	0.0931599	0.762052	0.0934975			0.690521	0.0849183	0.684102	0.0865163	0.686426	0.0857242	0.696386	0.0862654	0.728654	0.0889779	0.70926	0.087683	0.727701	0.0894094	0.692518	0.0859155	0.704648	0.088075	0.73717	0.0901637	0.717114	0.0886178	0.743322	0.0914756	0.741947	0.0915214
				0.68681	0.0856906	0.72042	0.0890642	0.754701	0.0924482	0.789665	0.0958428	0.767316	0.0938425	0.767316	0.0936727	0.767316	0.0940123			0.692524	0.0849773	0.683489	0.0862022	0.688476	0.0856818	0.698473	0.0862664	0.734476	0.0896242	0.711327	0.087649	0.733337	0.0900536	0.691526	0.0855468	0.706613	0.0881115	0.742923	0.0908061	0.71905	0.0886809	0.749117	0.0921389	0.742284	0.0916392
				ConcTikEll	ConcTikEll	ConcTikEll	ConcTikEll	ConcTikEll	ConcTikEll	ConcTikEll	ConcTikEll	0.772596	0.0943566	0.772596	0.0941858	0.772596	0.0945273			0.695243	0.0851302	0.683511	0.0859386	0.691258	0.0857307	0.701305	0.0863631	0.740424	0.0903189	0.714131	0.087707	0.739095	0.0907402	0.691555	0.0852892	0.70928	0.0882408	0.748801	0.0914954	0.721678	0.0888353	0.755039	0.0928459
												0.777892	0.0948709	0.777892	0.0946992	0.777892	0.0950426			0.698604	0.0853728	0.684167	0.0857306	0.694694	0.0858695	0.704804	0.0865528	0.746238	0.0910316	0.717596	0.0878552	0.744725	0.091439	0.692603	0.0851479	0.712575	0.0884593	0.754546	0.0922017	0.724927	0.0890767	0.760828	0.0935656
												0.783203	0.0953855	0.783203	0.0952128	0.783203	0.0955582			0.702515	0.0856984	0.685445	0.0855822	0.698692	0.0860945	0.708876	0.0868304	0.751664	0.0917312	0.721628	0.0880898	0.74998	0.0921196	0.694652	0.0851256	0.71641	0.0887611	0.759908	0.092894	0.728708	0.0893986	0.766231	0.0942667
												0.788531	0.0959003	0.788531	0.0957266	0.788531	0.096074			0.70687	0.0860981	0.687319	0.0854963	0.703143	0.0863996	0.713408	0.0871884	0.756465	0.092387	0.726115	0.0884043	0.754629	0.0927523	0.697659	0.0852226	0.720679	0.0891379	0.764652	0.093542	0.732918	0.0897922	0.771012	0.0949184
												0.793874	0.0964153	0.793874	0.0962407	0.793874	0.09659			0.711549	0.086561	0.689753	0.0854746	0.707924	0.0867763	0.718278	0.0876169	0.760432	0.0929705	0.730937	0.0887901	0.758471	0.0933093	0.701568	0.0854371	0.725266	0.0895795	0.768572	0.0941175	0.737442	0.0902467	0.774963	0.0954924
												0.799233	0.0969306	0.799233	0.096755	0.799233	0.0971062			0.716426	0.0870746	0.6927	0.0855175	0.712906	0.0872144	0.723353	0.0881043	0.763389	0.093456	0.735961	0.0892367	0.761337	0.0937663	0.706302	0.0857649	0.730046	0.0900738	0.771495	0.0945953	0.742157	0.0907498	0.777909	0.0959635
												0.804609	0.0974462	0.804609	0.0972696	0.804609	0.0976228			0.721367	0.0876248	0.696102	0.0856241	0.717953	0.0877021	0.728493	0.0886372	0.76521	0.0938225	0.74105	0.0897319	0.763101	0.0941034	0.711769	0.0861997	0.734889	0.0906073	0.773294	0.0949545	0.746933	0.0912877	0.779724	0.0963111
												0.81	0.0979619	0.81	0.0977844	0.81	0.0981395			0.726237	0.0881966	0.699894	0.0857925	0.722926	0.0882259	0.73356	0.0892012	0.765813	0.0940539	0.746066	0.0902622	0.763688	0.0943059	0.717862	0.0867329	0.739662	0.0911655	0.773891	0.0951794	0.751642	0.0918457	0.780327	0.09652
												0.81	0.0979619	0.81	0.0977844	0.81	0.0981395			0.730904	0.0887744	0.704	0.0860193	0.727691	0.0887716	0.738414	0.0897808	Red	Red	0.750872	0.0908131	Red	Red	0.724463	0.0873543	0.744235	0.0917331	Red	Red	0.756153	0.0924087	Red	Red
												IsoLine	IsoLine	ConcBand	ConcBand	ConcBand	ConcBand			0.73524	0.0893424	0.708342	0.0863001	0.732118	0.0893243	0.742924	0.0903603			0.755336	0.0913697			0.731443	0.0880517	0.748484	0.0922947			0.760345	0.0929613
																				0.739127	0.0898852	0.712835	0.0866294	0.736085	0.0898689	0.746966	0.0909238			0.759337	0.0919167			0.738667	0.0888114	0.752292	0.092835			0.764103	0.0934884
																				0.742459	0.0903879	0.717391	0.0870008	0.739484	0.0903906	0.75043	0.091456			0.762766	0.0924392			0.745994	0.0896189	0.755557	0.0933391			0.767324	0.0939756
																				0.745145	0.0908368	0.721922	0.0874072	0.742223	0.0908752	0.753221	0.0919423			0.765529	0.092923			0.753281	0.0904582	0.758187	0.0937935			0.769921	0.0944096
																				0.747112	0.0912198	0.72634	0.0878405	0.744228	0.0913093	0.755264	0.0923695			0.767551	0.0933548			0.760387	0.0913132	0.760113	0.0941856			0.771823	0.0947786
																				0.748306	0.0915262	0.730558	0.0882924	0.745442	0.0916813	0.756502	0.0927259			0.768776	0.0937229			0.767173	0.092167	0.761281	0.0945047			0.772977	0.0950726
																				0.748694	0.0917479	0.734494	0.0887541	0.745834	0.0919808	0.756903	0.0930019			0.769172	0.0940172			0.773507	0.0930033	0.76166	0.0947422			0.773353	0.0952834
																				Red	Red	0.738073	0.0892165	Red	Red	Red	Red			Red	Red			0.779266	0.0938056	Red	Red			Red	Red
																						0.741223	0.0896707											0.784337	0.0945583
																						0.743885	0.0901079											0.788622	0.0952468
																						0.746005	0.0905194											0.792039	0.0958577
																						0.747544	0.0908974											0.794519	0.096379
																						0.74847	0.0912344											0.796015	0.0968008
																						0.748766	0.091524											0.796497	0.0971146
																						Red	Red											Red	Red

## Sheet: PlotDat30
Source sheet	data	400	0.0448794	500	0
Plot name		402.941	0.0560592	525	0
Plot Type	16	405.882	0.069693	525	1
1st free col	7	408.824	0.0862312	500	1
Sigma Level	1	411.765	0.106187	500	0
Absolute Errs	FALSE	414.706	0.130137	ErrBox	ErrBox
Symbol Type	1	417.647	0.158729	525	0
Inverse Plot	FALSE	420.588	0.192677	550	0
Color Plot	TRUE	423.529	0.232767	550	9
3D plot	FALSE	426.471	0.279853	525	9
Linear	FALSE	429.412	0.334852	525	0
Data Range	AB63:AC84	432.353	0.39874	ErrBox	ErrBox
		435.294	0.472545	550	0
		438.235	0.557328	575	0
		441.176	0.654176	575	3
		444.118	0.764181	550	3
		447.059	0.888418	550	0
		450	1.02792	ErrBox	ErrBox
		452.941	1.18365	625	0
		455.882	1.35649	650	0
		458.824	1.54718	650	1
		461.765	1.7563	625	1
		464.706	1.98423	625	0
		467.647	2.23116	ErrBox	ErrBox
		470.588	2.49698	675	0
		473.529	2.78133	700	0
		476.471	3.08353	700	1
		479.412	3.40258	675	1
		482.353	3.73714	675	0
		485.294	4.08553	ErrBox	ErrBox
		488.235	4.44573	850	0
		491.176	4.81539	875	0
		494.118	5.19185	875	1
		497.059	5.57215	850	1
		500	5.95312	850	0
		502.941	6.33135	ErrBox	ErrBox
		505.882	6.70331	925	0
		508.824	7.06536	950	0
		511.765	7.41385	950	1
		514.706	7.74515	925	1
		517.647	8.05576	925	0
		520.588	8.34234	ErrBox	ErrBox
		523.529	8.60178	975	0
		526.471	8.8313	1000	0
		529.412	9.02845	1000	1
		532.353	9.1912	975	1
		535.294	9.31797	975	0
		538.235	9.40764	ErrBox	ErrBox
		541.176	9.45958
		544.118	9.47368
		547.059	9.45032
		550	9.39034
		552.941	9.29507
		555.882	9.16623
		558.824	9.00596
		561.765	8.8167
		564.706	8.60117
		567.647	8.36233
		570.588	8.10328
		573.529	7.82722
		576.471	7.53739
		579.412	7.23702
		582.353	6.92926
		585.294	6.61714
		588.235	6.30354
		591.176	5.99115
		594.118	5.68242
		597.059	5.37955
		600	5.0845
		602.941	4.79895
		605.882	4.52428
		608.824	4.26165
		611.765	4.01192
		614.706	3.77573
		617.647	3.55345
		620.588	3.34527
		623.529	3.15118
		626.471	2.97098
		629.412	2.80434
		632.353	2.65081
		635.294	2.50981
		638.235	2.38071
		641.176	2.26279
		644.118	2.15532
		647.059	2.05752
		650	1.96862
		652.941	1.88784
		655.882	1.81442
		658.823	1.74764
		661.765	1.68679
		664.706	1.63122
		667.647	1.58032
		670.588	1.53353
		673.529	1.49034
		676.471	1.45028
		679.412	1.41294
		682.353	1.37796
		685.294	1.34504
		688.235	1.31389
		691.176	1.28429
		694.118	1.25606
		697.059	1.22904
		700	1.20311
		702.941	1.17819
		705.882	1.1542
		708.823	1.1311
		711.765	1.10888
		714.706	1.08752
		717.647	1.06701
		720.588	1.04738
		723.529	1.02864
		726.471	1.01082
		729.412	0.993967
		732.353	0.978092
		735.294	0.963228
		738.235	0.949405
		741.176	0.936631
		744.118	0.924975
		747.059	0.914422
		750	0.905002
		752.941	0.896725
		755.882	0.889609
		758.823	0.883641
		761.765	0.878808
		764.706	0.875125
		767.647	0.872565
		770.588	0.871109
		773.529	0.870733
		776.471	0.871411
		779.412	0.873109
		782.353	0.875783
		785.294	0.879407
		788.235	0.883944
		791.176	0.88934
		794.118	0.895536
		797.059	0.902504
		800	0.910181
		802.941	0.918515
		805.882	0.927451
		808.823	0.936935
		811.765	0.946912
		814.706	0.957327
		817.647	0.968123
		820.588	0.979247
		823.529	0.990643
		826.471	1.00226
		829.412	1.01404
		832.353	1.02593
		835.294	1.03789
		838.235	1.04986
		841.176	1.0618
		844.118	1.07366
		847.059	1.08539
		850	1.09696
		852.941	1.10831
		855.882	1.11942
		858.823	1.13024
		861.765	1.14074
		864.706	1.15089
		867.647	1.16065
		870.588	1.16999
		873.529	1.17889
		876.471	1.18732
		879.412	1.19526
		882.353	1.20269
		885.294	1.20958
		888.235	1.21592
		891.176	1.22169
		894.118	1.22688
		897.059	1.23147
		900	1.23546
		902.941	1.23883
		905.882	1.24158
		908.823	1.24369
		911.765	1.24519
		914.706	1.24605
		917.647	1.24627
		920.588	1.24585
		923.529	1.2448
		926.471	1.24312
		929.412	1.24081
		932.353	1.23788
		935.294	1.23433
		938.235	1.23017
		941.176	1.22541
		944.118	1.22007
		947.059	1.21414
		950	1.20764
		952.941	1.20059
		955.882	1.19299
		958.824	1.18487
		961.765	1.17623
		964.706	1.16709
		967.647	1.15746
		970.588	1.14737
		973.529	1.13683
		976.471	1.12585
		979.412	1.11446
		982.353	1.10266
		985.294	1.09048
		988.235	1.07794
		991.176	1.06506
		994.118	1.05186
		997.059	1.03834
		1000	1.02454
		1002.94	1.01047
		1005.88	0.996149
		1008.82	0.981595
		1011.76	0.966828
		1014.71	0.951865
		1017.65	0.936726
		1020.59	0.921428
		1023.53	0.905989
		1026.47	0.890427
		1029.41	0.874759
		1032.35	0.859002
		1035.29	0.843172
		1038.24	0.827287
		1041.18	0.811362
		1044.12	0.795412
		1047.06	0.779453
		1050	0.763499
		1052.94	0.747565
		1055.88	0.731664
		1058.82	0.71581
		1061.76	0.700015
		1064.71	0.684293
		1067.65	0.668655
		1070.59	0.653113
		1073.53	0.637676
		1076.47	0.622357
		1079.41	0.607166
		1082.35	0.59211
		1085.29	0.5772
		1088.24	0.562445
		1091.18	0.547852
		1094.12	0.533429
		1097.06	0.519183
		1100	0.50512
		1102.94	0.491248
		1105.88	0.477571
		1108.82	0.464096
		1111.76	0.450826
		1114.71	0.437767
		1117.65	0.424922
		1120.59	0.412295
		1123.53	0.399889
		1126.47	0.387708
		1129.41	0.375753
		1132.35	0.364027
		1135.29	0.352532
		1138.24	0.341269
		1141.18	0.330239
		1144.12	0.319443
		1147.06	0.308882
		1150	0.298556
		1152.94	0.288463
		1155.88	0.278606
		1158.82	0.268981
		1161.76	0.25959
		1164.71	0.25043
		1167.65	0.241501
		1170.59	0.2328
		1173.53	0.224326
		1176.47	0.216077
		1179.41	0.208051
		1182.35	0.200246
		1185.29	0.192659
		1188.24	0.185288
		1191.18	0.17813
		1194.12	0.171181
		1197.06	0.16444
		1200	0.157903
		1202.94	0.151566
		1205.88	0.145427
		1208.82	0.139482
		1211.76	0.133727
		1214.71	0.128159
		1217.65	0.122775
		1220.59	0.117571
		1223.53	0.112543
		1226.47	0.107687
		1229.41	0.103
		1232.35	0.0984773
		1235.29	0.0941159
		1238.24	0.0899119
		1241.18	0.0858614
		1244.12	0.0819606
		1247.06	0.0782056
		1250	0.0745926
		1252.94	0.0711179
		1255.88	0.0677777
		1258.82	0.0645682
		1261.76	0.0614858
		1264.71	0.0585268
		1267.65	0.0556875
		1270.59	0.0529644
		1273.53	0.0503538
		1276.47	0.0478524
		1279.41	0.0454565
		1282.35	0.043163
		1285.29	0.0409681
		1288.24	0.038869
		1291.18	0.0368622
		1294.12	0.0349445
		1297.06	0.0331128
		1300	0.0313641
		1302.94	0.0296954
		1305.88	0.0281038
		1308.82	0.0265864
		1311.76	0.0251404
		1314.71	0.023763
		1317.65	0.0224517
		1320.59	0.0212039
		1323.53	0.0200169
		1326.47	0.0188884
		1329.41	0.017816
		1332.35	0.0167973
		1335.29	0.0158302
		1338.24	0.0149124
		1341.18	0.0140419
		1344.12	0.0132165
		1347.06	0.0124344
		1350	0.0116935
		1352.94	0.0109921
		1355.88	0.0103283
		1358.82	0.00970039
		1361.76	0.00910677
		1364.71	0.00854577
		1367.65	0.00801587
		1370.59	0.00751559
		1373.53	0.00703209
		1376.47	0.00658811
		1379.41	0.00616945
		1382.35	0.00577485
		1385.29	0.00540309
		1388.24	0.00505306
		1391.18	0.00472362
		1394.12	0.0044137
		1397.06	0.0041223
		IsoLine	IsoLine

## Sheet: PlotDat40
Source sheet	data	10.778	0.0654561	10	0.0603014	12.6623	0.0569604	11.1322	0.074	11.1947	0.0654561	11.341	0.0576807	12.3137	0.0588364	11.8385	0.0586236	12.0671	0.0631771	11.2887	0.0584919	11.7275	0.0585803	11.8203	0.0593947	12.0807	0.0589067	11.7444	0.0588924	11.7288	0.0588478	11.6807	0.0698663	12.0238	0.0596295	11.7835	0.0625414
Plot name	Concordia26	10.9364	0.0576807	10	0.0603015	12.3993	0.0572194	11.4191	0.054	11.189	0.0656974	11.3321	0.0578128	12.3076	0.0590442	11.8327	0.0588128	12.0612	0.0634925	11.2799	0.0586565	11.7103	0.0586763	11.8144	0.059606	12.0713	0.0589974	11.7274	0.0589624	11.7228	0.0590542	11.675	0.0700925	12.018	0.0598498	11.7794	0.0628573
Plot Type	1	11.8703	0.0588364	10.0723	0.0601841	12.1466	0.0574801			11.1721	0.0659322	11.306	0.0579392	12.2897	0.0592463	11.8157	0.0589969	12.0437	0.0637992	11.2541	0.0588138	11.6603	0.0587644	11.797	0.0598117	12.0435	0.059084	11.6777	0.0590267	11.7051	0.0592549	11.6582	0.0703125	12.0007	0.0600641	11.7673	0.0631671
1st free col	39	11.4191	0.0586236	10.1457	0.060067	11.9037	0.0577424			11.1445	0.0661539	11.2637	0.0580542	12.2602	0.0594373	11.7879	0.0591708	12.0151	0.064089	11.2123	0.058957	11.5813	0.0588377	11.7684	0.0600059	11.9986	0.059163	11.5995	0.0590801	11.676	0.0594445	11.6305	0.0705203	11.9724	0.0602666	11.7473	0.0634647
Sigma Level	1	11.6353	0.0631771	10.22	0.0599503	11.6699	0.0580063			11.1068	0.0663567	11.2071	0.058153	12.2202	0.0596118	11.75	0.0593298	11.9761	0.0643539	11.1564	0.0590799	11.48	0.0588901	11.7295	0.0601835	11.9384	0.0592307	11.4989	0.0591183	11.6364	0.0596179	11.593	0.0707104	11.9339	0.0604517	11.7199	0.0637444
Absolute Errs	FALSE	10.8888	0.0584919	10.2954	0.0598338	11.4448	0.0582719			11.0602	0.0665348	11.1387	0.0582311	12.1706	0.0597652	11.7031	0.0594695	11.9278	0.0645868	11.0887	0.0591772	11.3644	0.0589174	11.6813	0.0603396	11.8656	0.0592843	11.3842	0.0591382	11.5873	0.0597702	11.5464	0.0708773	11.8862	0.0606143	11.6856	0.0640006
Symbol Type	1	11.3041	0.0585803	10.3719	0.0597177	11.2279	0.0585392			11.0059	0.0666836	11.0615	0.0582851	12.1128	0.0598933	11.6485	0.0595862	11.8715	0.0647811	11.0123	0.0592444	11.2439	0.0589174	11.6252	0.0604699	11.7834	0.0593213	11.2647	0.0591382	11.5302	0.0598974	11.4922	0.0710168	11.8307	0.0607501	11.645	0.0642284
Inverse Plot	TRUE	11.3897	0.0593947	10.4495	0.0596019	11.0187	0.0588081			10.9454	0.0667988	10.9787	0.0583127	12.0484	0.0599925	11.5875	0.0596765	11.8087	0.0649317	10.9306	0.0592788	11.1283	0.0588901	11.5627	0.0605708	11.6955	0.0593403	11.1501	0.0591183	11.4665	0.0599959	11.4317	0.0711248	11.7688	0.0608553	11.599	0.0644234
Color Plot	TRUE	11.6505	0.0589067	10.5282	0.0594863	10.8169	0.0590788			10.8803	0.0668775	10.8942	0.0583127	11.9791	0.0600602	11.522	0.0597382	11.7413	0.0650345	10.847	0.0592788	11.0269	0.0588377	11.4954	0.0606397	11.6055	0.0593403	11.0495	0.0590801	11.398	0.0600632	11.3667	0.0711985	11.7022	0.0609271	11.5484	0.0645818
3D plot	FALSE	11.3245	0.0588924	10.608	0.0593711	10.622	0.0593511			10.8124	0.0669173	10.8114	0.0582851	11.9069	0.0600945	11.4537	0.0597695	11.6709	0.0650866	10.7652	0.0592444	10.948	0.0587644	11.4252	0.0606746	11.5176	0.0593213	10.9712	0.0590267	11.3265	0.0600973	11.2989	0.0712358	11.6328	0.0609635	11.4943	0.0647004
Linear	FALSE	11.2903	0.0588478	10.689	0.0592562	10.4338	0.0596252			10.7436	0.0669173	10.7342	0.0582311	11.8337	0.0600945	11.3845	0.0597695	11.5996	0.0650866	10.6888	0.0591772	10.8979	0.0586763	11.3541	0.0606746	11.4354	0.0592843	10.9216	0.0589624	11.2541	0.0600973	11.2302	0.0712358	11.5624	0.0609635	11.4376	0.064777
Data Range	R64:U78	11.2646	0.0698663	10.7712	0.0591416	10.2518	0.059901			10.6758	0.0668775	10.6657	0.058153	11.7614	0.0600602	11.3161	0.0597382	11.5293	0.0650345	10.6212	0.0590799	10.8808	0.0585803	11.2839	0.0606397	11.3626	0.0592307	10.9046	0.0588924	11.1827	0.0600632	11.1624	0.0711985	11.493	0.0609271	11.3795	0.0648101
		11.5976	0.0596295	10.8546	0.0590273	10.0758	0.0601785			10.6107	0.0667988	10.6092	0.0580542	11.6922	0.0599925	11.2506	0.0596765	11.4618	0.0649317	10.5652	0.058957	10.8979	0.0584844	11.2167	0.0605708	11.3025	0.059163	10.9216	0.0588224	11.1142	0.0599959	11.0974	0.0711248	11.4264	0.0608553	11.3212	0.0647991
		11.3649	0.0625414	10.9392	0.0589133	IsoLine	IsoLine			10.5502	0.0666836	10.5669	0.0579392	11.6278	0.0598933	11.1897	0.0595862	11.3991	0.0647811	10.5234	0.0588138	10.948	0.0583962	11.1541	0.0604699	11.2575	0.059084	10.9712	0.0587581	11.0505	0.0598974	11.037	0.0710168	11.3645	0.0607501	11.2637	0.0647441
		IsoLine	IsoLine	11.0252	0.0587996					10.4958	0.0665348	10.5407	0.0578128	11.57	0.0597652	11.1351	0.0594695	11.3428	0.0645868	10.4976	0.0586565	11.0269	0.0583229	11.098	0.0603396	11.2297	0.0589974	11.0495	0.0587047	10.9933	0.0597702	10.9827	0.0708773	11.3089	0.0606143	11.2081	0.0646462
				11.1124	0.0586862					10.4492	0.0663567	10.5319	0.0576807	11.5204	0.0596118	11.0881	0.0593298	11.2945	0.0643539	10.4889	0.0584919	11.1283	0.0582705	11.0498	0.0601835	11.2203	0.0589067	11.1501	0.0586665	10.9443	0.0596179	10.9362	0.0707104	11.2613	0.0604517	11.1556	0.0645074
				11.201	0.0585731					10.4116	0.0661539	10.5407	0.0575485	11.4803	0.0594373	11.0503	0.0591708	11.2555	0.064089	10.4976	0.0583274	11.2439	0.0582432	11.0109	0.0600059	11.2297	0.0588161	11.2647	0.0586466	10.9047	0.0594445	10.8986	0.0705203	11.2228	0.0602666	11.1072	0.0643303
				11.2909	0.0584603					10.384	0.0659322	10.5669	0.0574221	11.4509	0.0592463	11.0224	0.0589969	11.2268	0.0637992	10.5234	0.0581701	11.3644	0.0582432	10.9823	0.0598117	11.2575	0.0587294	11.3842	0.0586466	10.8756	0.0592549	10.871	0.0703125	11.1945	0.0600641	11.0638	0.0641183
				11.3822	0.0583478					10.3671	0.0656974	10.6092	0.0573071	11.433	0.0590442	11.0054	0.0588128	11.2093	0.0634925	10.5652	0.0580269	11.48	0.0582705	10.9649	0.059606	11.3025	0.0586505	11.4989	0.0586665	10.8578	0.0590542	10.8541	0.0700925	11.1772	0.0598498	11.0263	0.0638757
				11.475	0.0582356					10.3614	0.0654561	10.6657	0.0572083	11.4269	0.0588364	10.9997	0.0586236	11.2034	0.0631771	10.6212	0.057904	11.5813	0.0583229	10.959	0.0593947	11.3626	0.0585828	11.5995	0.0587047	10.8518	0.0588478	10.8485	0.0698663	11.1714	0.0596295	10.9954	0.0636071
				11.5692	0.0581237					10.3671	0.0652147	10.7342	0.0571302	11.433	0.0586287	11.0054	0.0584344	11.2093	0.0628617	10.6888	0.0578067	11.6603	0.0583962	10.9649	0.0591833	11.4354	0.0585292	11.6777	0.0587581	10.8578	0.0586415	10.8541	0.0696401	11.1772	0.0594092	10.9716	0.0633178
				11.6649	0.0580121					10.384	0.06498	10.8114	0.0570762	11.4509	0.0584266	11.0224	0.0582503	11.2268	0.062555	10.7652	0.0577395	11.7103	0.0584844	10.9823	0.0589776	11.5176	0.0584921	11.7274	0.0588224	10.8756	0.0584408	10.871	0.0694201	11.1945	0.0591949	10.9555	0.0630134
				11.7622	0.0579007					10.4116	0.0647582	10.8942	0.0570486	11.4803	0.0582356	11.0503	0.0580764	11.2555	0.0622652	10.847	0.0577051	11.7275	0.0585803	11.0109	0.0587834	11.6055	0.0584732	11.7444	0.0588924	10.9047	0.0582511	10.8986	0.0692122	11.2228	0.0589924	10.9474	0.0626997
				11.861	0.0577897					10.4492	0.0645555	10.9787	0.0570486	11.5204	0.0580611	11.0881	0.0579174	11.2945	0.0620003	10.9306	0.0577051	Red	Red	11.0498	0.0586058	11.6955	0.0584732	Red	Red	10.9443	0.0580778	10.9362	0.0690222	11.2613	0.0588073	10.9474	0.062383
				11.9614	0.057679					10.4958	0.0643773	11.0615	0.0570762	11.57	0.0579077	11.1351	0.0577777	11.3428	0.0617675	11.0123	0.0577395			11.098	0.0584497	11.7834	0.0584921			10.9933	0.0579254	10.9827	0.0688552	11.3089	0.0586447	10.9555	0.0620694
				12.0635	0.0575685					10.5502	0.0642285	11.1387	0.0571302	11.6278	0.0577796	11.1897	0.057661	11.3991	0.0615731	11.0887	0.0578067			11.1541	0.0583194	11.8656	0.0585292			11.0505	0.0577983	11.037	0.0687158	11.3645	0.0585089	10.9716	0.0617649
				12.1672	0.0574584					10.6107	0.0641133	11.2071	0.0572083	11.6922	0.0576804	11.2506	0.0575707	11.4618	0.0614225	11.1564	0.057904			11.2167	0.0582185	11.9384	0.0585828			11.1142	0.0576997	11.0974	0.0686078	11.4264	0.0584037	10.9954	0.0614756
				12.2727	0.0573485					10.6758	0.0640347	11.2637	0.0573071	11.7614	0.0576127	11.3161	0.057509	11.5293	0.0613197	11.2123	0.0580269			11.2839	0.0581496	11.9986	0.0586505			11.1827	0.0576325	11.1624	0.0685341	11.493	0.0583319	11.0263	0.061207
				12.38	0.0572389					10.7436	0.0639948	11.306	0.0574221	11.8337	0.0575784	11.3845	0.0574777	11.5996	0.0612677	11.2541	0.0581701			11.3541	0.0581147	12.0435	0.0587294			11.2541	0.0575984	11.2302	0.0684967	11.5624	0.0582955	11.0638	0.0609644
				12.4891	0.0571296					10.8124	0.0639948	11.3321	0.0575485	11.9069	0.0575784	11.4537	0.0574777	11.6709	0.0612677	11.2799	0.0583274			11.4252	0.0581147	12.0713	0.0588161			11.3265	0.0575984	11.2989	0.0684967	11.6328	0.0582955	11.1072	0.0607525
				12.6	0.0570206					10.8803	0.0640347	11.341	0.0576807	11.9791	0.0576127	11.522	0.057509	11.7413	0.0613197	11.2887	0.0584919			11.4954	0.0581496	12.0807	0.0589067			11.398	0.0576325	11.3667	0.0685341	11.7022	0.0583319	11.1556	0.0605754
				12.6	0.0570206					10.9454	0.0641133	Red	Red	12.0484	0.0576804	11.5875	0.0575707	11.8087	0.0614225	Red	Red			11.5627	0.0582185	Red	Red			11.4665	0.0576997	11.4317	0.0686078	11.7688	0.0584037	11.2081	0.0604365
				IsoLine	IsoLine					11.0059	0.0642285			12.1128	0.0577796	11.6485	0.057661	11.8715	0.0615731					11.6252	0.0583194					11.5302	0.0577983	11.4922	0.0687158	11.8307	0.0585089	11.2637	0.0603387
										11.0602	0.0643773			12.1706	0.0579077	11.7031	0.0577777	11.9278	0.0617675					11.6813	0.0584497					11.5873	0.0579254	11.5464	0.0688552	11.8862	0.0586447	11.3212	0.0602837
										11.1068	0.0645555			12.2202	0.0580611	11.75	0.0579174	11.9761	0.0620003					11.7295	0.0586058					11.6364	0.0580778	11.593	0.0690222	11.9339	0.0588073	11.3795	0.0602726
										11.1445	0.0647582			12.2602	0.0582356	11.7879	0.0580764	12.0151	0.0622652					11.7684	0.0587834					11.676	0.0582511	11.6305	0.0692122	11.9724	0.0589924	11.4376	0.0603057
										11.1721	0.06498			12.2897	0.0584266	11.8157	0.0582503	12.0437	0.062555					11.797	0.0589776					11.7051	0.0584408	11.6582	0.0694201	12.0007	0.0591949	11.4943	0.0603824
										11.189	0.0652147			12.3076	0.0586287	11.8327	0.0584344	12.0612	0.0628617					11.8144	0.0591833					11.7228	0.0586415	11.675	0.0696401	12.018	0.0594092	11.5484	0.060501
										11.1947	0.0654561			12.3137	0.0588364	11.8385	0.0586236	12.0671	0.0631771					11.8203	0.0593947					11.7288	0.0588478	11.6807	0.0698663	12.0238	0.0596295	11.599	0.0606593
										Red	Red			Red	Red	Red	Red	Red	Red					Red	Red					Red	Red	Red	Red	Red	Red	11.645	0.0608543
																																				11.6856	0.0610822
																																				11.7199	0.0613384
																																				11.7473	0.061618
																																				11.7673	0.0619156
																																				11.7794	0.0622254
																																				11.7835	0.0625414
																																				Red	Red

## Sheet: PlotDat42
Source sheet	data	11.8703	0.0588364	10.6	0.0593826	12.6623	0.0569604	11.2673	0.074	12.3137	0.0588364	11.8385	0.0586236	12.0671	0.0631771	11.7275	0.0585803	11.8203	0.0593947	12.0807	0.0589067	11.7444	0.0588924	11.7288	0.0588478	11.6807	0.0698663	12.0238	0.0596295	11.7835	0.0625414
Plot name	Concordia28	11.4191	0.0586236	10.6	0.0593826	12.3993	0.0572194	11.5577	0.054	12.3076	0.0590442	11.8327	0.0588128	12.0612	0.0634925	11.7103	0.0586763	11.8144	0.059606	12.0713	0.0589974	11.7274	0.0589624	11.7228	0.0590542	11.675	0.0700925	12.018	0.0598498	11.7794	0.0628573
Plot Type	1	11.6353	0.0631771	10.6587	0.0592989	12.1466	0.0574801			12.2897	0.0592463	11.8157	0.0589969	12.0437	0.0637992	11.6603	0.0587644	11.797	0.0598117	12.0435	0.059084	11.6777	0.0590267	11.7051	0.0592549	11.6582	0.0703125	12.0007	0.0600641	11.7673	0.0631671
1st free col	33	11.3041	0.0585803	10.7181	0.0592154	11.9037	0.0577424			12.2602	0.0594373	11.7879	0.0591708	12.0151	0.064089	11.5813	0.0588377	11.7684	0.0600059	11.9986	0.059163	11.5995	0.0590801	11.676	0.0594445	11.6305	0.0705203	11.9724	0.0602666	11.7473	0.0634647
Sigma Level	1	11.3897	0.0593947	10.7781	0.0591321	11.6699	0.0580063			12.2202	0.0596118	11.75	0.0593298	11.9761	0.0643539	11.48	0.0588901	11.7295	0.0601835	11.9384	0.0592307	11.4989	0.0591183	11.6364	0.0596179	11.593	0.0707104	11.9339	0.0604517	11.7199	0.0637444
Absolute Errs	FALSE	11.6505	0.0589067	10.8387	0.0590489	11.4448	0.0582719			12.1706	0.0597652	11.7031	0.0594695	11.9278	0.0645868	11.3644	0.0589174	11.6813	0.0603396	11.8656	0.0592843	11.3842	0.0591382	11.5873	0.0597702	11.5464	0.0708773	11.8862	0.0606143	11.6856	0.0640006
Symbol Type	1	11.3245	0.0588924	10.9	0.0589659	11.2279	0.0585392			12.1128	0.0598933	11.6485	0.0595862	11.8715	0.0647811	11.2439	0.0589174	11.6252	0.0604699	11.7834	0.0593213	11.2647	0.0591382	11.5302	0.0598974	11.4922	0.0710168	11.8307	0.0607501	11.645	0.0642284
Inverse Plot	TRUE	11.2903	0.0588478	10.962	0.058883	11.0187	0.0588081			12.0484	0.0599925	11.5875	0.0596765	11.8087	0.0649317	11.1283	0.0588901	11.5627	0.0605708	11.6955	0.0593403	11.1501	0.0591183	11.4665	0.0599959	11.4317	0.0711248	11.7688	0.0608553	11.599	0.0644234
Color Plot	TRUE	11.2646	0.0698663	11.0246	0.0588004	10.8169	0.0590788			11.9791	0.0600602	11.522	0.0597382	11.7413	0.0650345	11.0269	0.0588377	11.4954	0.0606397	11.6055	0.0593403	11.0495	0.0590801	11.398	0.0600632	11.3667	0.0711985	11.7022	0.0609271	11.5484	0.0645818
3D plot	FALSE	11.5976	0.0596295	11.0879	0.0587178	10.622	0.0593511			11.9069	0.0600945	11.4537	0.0597695	11.6709	0.0650866	10.948	0.0587644	11.4252	0.0606746	11.5176	0.0593213	10.9712	0.0590267	11.3265	0.0600973	11.2989	0.0712358	11.6328	0.0609635	11.4943	0.0647004
Linear	FALSE	11.3649	0.0625414	11.152	0.0586354	IsoLine	IsoLine			11.8337	0.0600945	11.3845	0.0597695	11.5996	0.0650866	10.8979	0.0586763	11.3541	0.0606746	11.4354	0.0592843	10.9216	0.0589624	11.2541	0.0600973	11.2302	0.0712358	11.5624	0.0609635	11.4376	0.064777
Data Range	R66:U78	IsoLine	IsoLine	11.2167	0.0585532					11.7614	0.0600602	11.3161	0.0597382	11.5293	0.0650345	10.8808	0.0585803	11.2839	0.0606397	11.3626	0.0592307	10.9046	0.0588924	11.1827	0.0600632	11.1624	0.0711985	11.493	0.0609271	11.3795	0.0648101
				11.2822	0.0584711					11.6922	0.0599925	11.2506	0.0596765	11.4618	0.0649317	10.8979	0.0584844	11.2167	0.0605708	11.3025	0.059163	10.9216	0.0588224	11.1142	0.0599959	11.0974	0.0711248	11.4264	0.0608553	11.3212	0.0647991
				11.3484	0.0583892					11.6278	0.0598933	11.1897	0.0595862	11.3991	0.0647811	10.948	0.0583962	11.1541	0.0604699	11.2575	0.059084	10.9712	0.0587581	11.0505	0.0598974	11.037	0.0710168	11.3645	0.0607501	11.2637	0.0647441
				11.4153	0.0583075					11.57	0.0597652	11.1351	0.0594695	11.3428	0.0645868	11.0269	0.0583229	11.098	0.0603396	11.2297	0.0589974	11.0495	0.0587047	10.9933	0.0597702	10.9827	0.0708773	11.3089	0.0606143	11.2081	0.0646462
				11.4831	0.0582259					11.5204	0.0596118	11.0881	0.0593298	11.2945	0.0643539	11.1283	0.0582705	11.0498	0.0601835	11.2203	0.0589067	11.1501	0.0586665	10.9443	0.0596179	10.9362	0.0707104	11.2613	0.0604517	11.1556	0.0645074
				11.5516	0.0581445					11.4803	0.0594373	11.0503	0.0591708	11.2555	0.064089	11.2439	0.0582432	11.0109	0.0600059	11.2297	0.0588161	11.2647	0.0586466	10.9047	0.0594445	10.8986	0.0705203	11.2228	0.0602666	11.1072	0.0643303
				11.6208	0.0580632					11.4509	0.0592463	11.0224	0.0589969	11.2268	0.0637992	11.3644	0.0582432	10.9823	0.0598117	11.2575	0.0587294	11.3842	0.0586466	10.8756	0.0592549	10.871	0.0703125	11.1945	0.0600641	11.0638	0.0641183
				11.6909	0.0579821					11.433	0.0590442	11.0054	0.0588128	11.2093	0.0634925	11.48	0.0582705	10.9649	0.059606	11.3025	0.0586505	11.4989	0.0586665	10.8578	0.0590542	10.8541	0.0700925	11.1772	0.0598498	11.0263	0.0638757
				11.7618	0.0579011					11.4269	0.0588364	10.9997	0.0586236	11.2034	0.0631771	11.5813	0.0583229	10.959	0.0593947	11.3626	0.0585828	11.5995	0.0587047	10.8518	0.0588478	10.8485	0.0698663	11.1714	0.0596295	10.9954	0.0636071
				11.8336	0.0578203					11.433	0.0586287	11.0054	0.0584344	11.2093	0.0628617	11.6603	0.0583962	10.9649	0.0591833	11.4354	0.0585292	11.6777	0.0587581	10.8578	0.0586415	10.8541	0.0696401	11.1772	0.0594092	10.9716	0.0633178
				11.9061	0.0577396					11.4509	0.0584266	11.0224	0.0582503	11.2268	0.062555	11.7103	0.0584844	10.9823	0.0589776	11.5176	0.0584921	11.7274	0.0588224	10.8756	0.0584408	10.871	0.0694201	11.1945	0.0591949	10.9555	0.0630134
				11.9796	0.0576591					11.4803	0.0582356	11.0503	0.0580764	11.2555	0.0622652	11.7275	0.0585803	11.0109	0.0587834	11.6055	0.0584732	11.7444	0.0588924	10.9047	0.0582511	10.8986	0.0692122	11.2228	0.0589924	10.9474	0.0626997
				12.0539	0.0575788					11.5204	0.0580611	11.0881	0.0579174	11.2945	0.0620003	Red	Red	11.0498	0.0586058	11.6955	0.0584732	Red	Red	10.9443	0.0580778	10.9362	0.0690222	11.2613	0.0588073	10.9474	0.062383
				12.1291	0.0574986					11.57	0.0579077	11.1351	0.0577777	11.3428	0.0617675			11.098	0.0584497	11.7834	0.0584921			10.9933	0.0579254	10.9827	0.0688552	11.3089	0.0586447	10.9555	0.0620694
				12.2052	0.0574185					11.6278	0.0577796	11.1897	0.057661	11.3991	0.0615731			11.1541	0.0583194	11.8656	0.0585292			11.0505	0.0577983	11.037	0.0687158	11.3645	0.0585089	10.9716	0.0617649
				12.2823	0.0573387					11.6922	0.0576804	11.2506	0.0575707	11.4618	0.0614225			11.2167	0.0582185	11.9384	0.0585828			11.1142	0.0576997	11.0974	0.0686078	11.4264	0.0584037	10.9954	0.0614756
				12.3602	0.0572589					11.7614	0.0576127	11.3161	0.057509	11.5293	0.0613197			11.2839	0.0581496	11.9986	0.0586505			11.1827	0.0576325	11.1624	0.0685341	11.493	0.0583319	11.0263	0.061207
				12.4392	0.0571793					11.8337	0.0575784	11.3845	0.0574777	11.5996	0.0612677			11.3541	0.0581147	12.0435	0.0587294			11.2541	0.0575984	11.2302	0.0684967	11.5624	0.0582955	11.0638	0.0609644
				12.5191	0.0570999					11.9069	0.0575784	11.4537	0.0574777	11.6709	0.0612677			11.4252	0.0581147	12.0713	0.0588161			11.3265	0.0575984	11.2989	0.0684967	11.6328	0.0582955	11.1072	0.0607525
				12.6	0.0570206					11.9791	0.0576127	11.522	0.057509	11.7413	0.0613197			11.4954	0.0581496	12.0807	0.0589067			11.398	0.0576325	11.3667	0.0685341	11.7022	0.0583319	11.1556	0.0605754
				12.6	0.0570206					12.0484	0.0576804	11.5875	0.0575707	11.8087	0.0614225			11.5627	0.0582185	Red	Red			11.4665	0.0576997	11.4317	0.0686078	11.7688	0.0584037	11.2081	0.0604365
				IsoLine	IsoLine					12.1128	0.0577796	11.6485	0.057661	11.8715	0.0615731			11.6252	0.0583194					11.5302	0.0577983	11.4922	0.0687158	11.8307	0.0585089	11.2637	0.0603387
										12.1706	0.0579077	11.7031	0.0577777	11.9278	0.0617675			11.6813	0.0584497					11.5873	0.0579254	11.5464	0.0688552	11.8862	0.0586447	11.3212	0.0602837
										12.2202	0.0580611	11.75	0.0579174	11.9761	0.0620003			11.7295	0.0586058					11.6364	0.0580778	11.593	0.0690222	11.9339	0.0588073	11.3795	0.0602726
										12.2602	0.0582356	11.7879	0.0580764	12.0151	0.0622652			11.7684	0.0587834					11.676	0.0582511	11.6305	0.0692122	11.9724	0.0589924	11.4376	0.0603057
										12.2897	0.0584266	11.8157	0.0582503	12.0437	0.062555			11.797	0.0589776					11.7051	0.0584408	11.6582	0.0694201	12.0007	0.0591949	11.4943	0.0603824
										12.3076	0.0586287	11.8327	0.0584344	12.0612	0.0628617			11.8144	0.0591833					11.7228	0.0586415	11.675	0.0696401	12.018	0.0594092	11.5484	0.060501
										12.3137	0.0588364	11.8385	0.0586236	12.0671	0.0631771			11.8203	0.0593947					11.7288	0.0588478	11.6807	0.0698663	12.0238	0.0596295	11.599	0.0606593
										Red	Red	Red	Red	Red	Red			Red	Red					Red	Red	Red	Red	Red	Red	11.645	0.0608543
																														11.6856	0.0610822
																														11.7199	0.0613384
																														11.7473	0.061618
																														11.7673	0.0619156
																														11.7794	0.0622254
																														11.7835	0.0625414
																														Red	Red

[truncated: 6 more sheets: PlotDat45, PlotDat47, PlotDat51, PlotDat4, PlotDat5, U-Pb data]
